# Supplementary material
Source: publisher figshare collection journal article supplement (https://tandf.figshare.com/articles/dataset/_/7001348)
Supplement: Supplementary file 1 [file 1]

# **Methods used to assess the performance of biomarkers for the diagnosis of Acute Kidney Injury: a systematic review and meta-analysis:**

Anaïs Codorniu<sup>1,2</sup>, MD, Léa Lemasle<sup>1,2</sup>, MD, Matthieu Legrand<sup>1,2</sup>, MD, PhD, Alice Blet<sup>1,2</sup>, MD, PhD, Alexandre Mebazaa<sup>1,2</sup>, MD, PhD, Etienne Gayat<sup>1,2</sup> MD, PhD

<sup>1</sup> Department of Anesthesiology, Intensive Care and Burn Unit, University Hospital Saint Louis – Lariboisière, Assistance Publique – Hôpitaux de Paris, Paris, France

<sup>2</sup> Biomarkers in CARDio-Neuro-VAScular diseases (BioCANVAS), UMR-S 942, Inserm, Paris, France

---

## **Supplementary Material**

## **Supplementary 1.** Medline search.

((((((((((("cystatin c"[MeSH Terms] OR "cystatin c"[All Fields]) OR kim-1[All Fields]) OR ngal[All Fields]) OR "neutrophil gelatinase associated lipocalin"[All Fields]) OR nag[All Fields]) OR igfbp7[All Fields]) OR ("tissue inhibitor of metalloproteinase-2"[MeSH Terms] OR ("tissue"[All Fields] AND "inhibitor"[All Fields] AND "metalloproteinase-2"[All Fields]) OR "tissue inhibitor of metalloproteinase-2"[All Fields] OR "timp 2"[All Fields])) OR l-fabp[All Fields]) OR ("fatty acid-binding proteins"[MeSH Terms] OR ("fatty"[All Fields] AND "acid-binding"[All Fields] AND "proteins"[All Fields]) OR "fatty acid-binding proteins"[All Fields] OR ("liver"[All Fields] AND "fatty"[All Fields] AND "acid"[All Fields] AND "binding"[All Fields] AND "protein"[All Fields]) OR "liver fatty acid binding protein"[All Fields])) OR (alpha[All Fields] AND ("glutathione transferase"[MeSH Terms] OR ("glutathione"[All Fields] AND "transferase"[All Fields]) OR "glutathione transferase"[All Fields] OR "glutathione s transferase"[All Fields]))) OR ("interleukin-18"[MeSH Terms] OR "interleukin-18"[All Fields] OR "il 18"[All Fields])) OR hepcidin-25[All Fields]) OR ("biomarkers"[MeSH Terms] OR "biomarkers"[All Fields])) AND "acute kidney injury"[MeSH Terms]
