# Supplementary material
Source: publisher figshare collection journal article supplement (https://tandf.figshare.com/articles/dataset/_/7001348)
Supplement: Supplementary file 2 [file 1]

**Methods used to assess the performance of biomarkers for the diagnosis of Acute Kidney Injury: a systematic review and meta-analysis:**

Anaïs Codorniu<sup>1,2</sup>,MD, Léa Lemasle<sup>1,2</sup>,MD, Matthieu Legrand<sup>1,2</sup>,MD,PhD, Alice Blet<sup>1,2</sup>,MD,PhD, Alexandre Mebazaa<sup>1,2</sup>,MD, PhD, Etienne Gayat<sup>1,2</sup> MD, PhD

<sup>1</sup> Department of Anesthesiology, Intensive Care and Burn Unit, University Hospital Saint Louis – Lariboisière, Assistance Publique – Hôpitaux de Paris, Paris, France

<sup>2</sup> Biomarkers in CArdio-Neuro-VAScular diseases (BioCANVAS), UMR-S 942, Inserm, Paris, France

---

**Supplementary Material**

**Supplementary file 2.** Studies included in the systematic review.

| Title                                                                                                                                                                                                                                                      | Journal                                                | Author         | Year of publication | Study type |            | Number of centers | Number of included patients | Population                               | diagnostic AKI | Number of patients with AKI |
|------------------------------------------------------------------------------------------------------------------------------------------------------------------------------------------------------------------------------------------------------------|--------------------------------------------------------|----------------|---------------------|------------|------------|-------------------|-----------------------------|------------------------------------------|----------------|-----------------------------|
| Some biomarkers of acute kidney injury are increased in pre-renal acute injury                                                                                                                                                                             | Kidney International                                   | Nejat          | 2012                | observ     | diagnostic | 2                 | 489                         | ICU patients                             | AKIN           | 204                         |
| Serum uric acid may predict development of progressive acute kidney injury after open h eartsurgery.                                                                                                                                                       | Renal Failure                                          | Gaipov         | 2015                | observ     | diagnostic | 1                 | 60                          | cardiac surgery                          | KDIGO          | 40                          |
| Urinary $\alpha$ - and $\pi$ -glutathione s-transferases for early detection of acute kidney injury following cardiopulmonary bypass                                                                                                                       | Biomarkers                                             | Susantitaphong | 2013                | observ     | diagnostic | 3                 | 252                         | cardiac surgery                          | AKIN           | 72                          |
| Combination of urinary kidney injury molecule-1 and interleukin-18 as early biomarker for the diagnosis and progressive assessment of acute kidney injury following cardiopulmonary bypass surgery: a prospective nested case-control study.               | Biomarkers                                             | Liang          | 2010                | observ     | diagnostic | 1                 | 122                         | cardiac surgery with CPB                 | RIFLE          | 30                          |
| comparison of serum creatinine, cystatin C, and Neutrophil gelatinase-associated lipocalin for acute kidney injury occurrence according to risk, failuer, injury, loss, and end-stage criteria classification system in early after living kidney donation | Saudi Journal of kidney diseases and transplantation   | Hekmat         | 2016                | observ     | diagnostic | 1                 | 42                          | living kidney donors                     | RIFLE          | 20                          |
| Urinary cystatin C as an early biomarker of acute kidney injury following adult cardiothoracic surgery.                                                                                                                                                    | Kidney International                                   | Koyner         | 2008                | observ     | diagnostic | 1                 | 72                          | Adult cardiothoracic surgery             | Other          | 34                          |
| Performance of kidney injury molecule-1 and liver fatty acid-binding protein and combined biomarkers of AKI after cardiac surgery.                                                                                                                         | clinical journal of the American Society of Nephrology | Parikh         | 2013                | observ     | diagnostic | 6                 | 1219                        | Cardiac surgery                          | Other          | 60                          |
| Neutrophil gelatinase-associated lipocalin and liver-type fatty acid-binding protein as biomarkers for acute kidney injury after organ transplantation.                                                                                                    | journal of Anesthesia                                  | Iguchi         | 2015                | observ     | diagnostic | 1                 | 25                          | heart, lung, liver transplantations      | KDIGO          | 11                          |
| Urinary KIM-1, NGAL and L-FABP for the diagnosis of AKI in patients with acute coronary syndrome or heart failure undergoing coronary angiography.                                                                                                         | Heart Vessels                                          | Torregrosa     | 2015                | observ     | diagnostic | 1                 | 144                         | acute coronary syndrome or heart failure | RIFLE          | 20                          |
| Urinary KIM-1, NGAL and L-FABP for the diagnosis of AKI in patients with acute coronary syndrome or heart failure undergoing coronary angiography.                                                                                                         | Heart Vessels                                          | Torregrosa     | 2015                | observ     | diagnostic | 1                 | 49                          | cardiac surgery                          | RIFLE          | 15                          |

|                                                                                                                                                                                                     |                                                      |             |      |        |            |    |     |                                                                             |       |     |
|-----------------------------------------------------------------------------------------------------------------------------------------------------------------------------------------------------|------------------------------------------------------|-------------|------|--------|------------|----|-----|-----------------------------------------------------------------------------|-------|-----|
| Combination of biomarkers for diagnosis of acute kidney injury after cardiopulmonary bypass.                                                                                                        | Renal Failure                                        | Prowle      | 2015 | interv | diagnostic | 1  | 93  | cardiac surgery with CPB with at least one risk factor for AKI              | RIFLE | 25  |
| Urinary neutrophil gelatinase-associated lipocalin and L-type fatty acid binding protein as diagnostic markers of early acute kidney injury after liver transplantation.                            | Biomarkers                                           | Li          | 2012 | observ | diagnostic | 1  | 25  | liver transplantation                                                       | AKIN  | 11  |
| Evaluation of urinary tissue inhibitor of metalloproteinase-2 in acute kidney injury: a prospective observational study.                                                                            | critical care                                        | Yamashita   | 2014 | observ | diagnostic | NR | 98  | ICU patients                                                                | KDIGO | 42  |
| The role of urinary liver-type fatty acid-binding protein in critically ill patients.                                                                                                               | journal of Korean medical science                    | Cho         | 2013 | observ | diagnostic | 1  | 145 | ICU patients                                                                | AKIN  | 54  |
| Assessment of cell-cycle arrest biomarkers to predict early and delayed acute kidney injury.                                                                                                        | disease markers                                      | Bell        | 2015 | observ | diagnostic | 1  | 94  | ICU patients                                                                | KDIGO | 19  |
| Urinary biomarkers TIMP-2 and IGFBP7 early predict acute kidney injury after major surgery.                                                                                                         | PLOS one                                             | Gocze       | 2015 | observ | diagnostic | 1  | 107 | High risk AKI patients after non cardiac surgery                            | KDIGO | 45  |
| Clinical usefulness of urinary liver-type fatty-acid-binding protein as a perioperative marker of acute kidney injury in patients undergoing endovascular or open-abdominal aortic aneurysm repair. | journal of Anesthesia                                | Obata       | 2016 | observ | diagnostic | 1  | 95  | endovascular anevrysm repair (EVAR                                          | AKIN  | 9   |
|                                                                                                                                                                                                     | journal of Anesthesia                                | Obata       | 2016 | observ | diagnostic | 1  | 42  | open repair anevrysm                                                        | AKIN  | 13  |
| Urinary L-FABP and its combination with urinary NGAL in early diagnosis of acute kidney injury after cardiac surgery in adult patients.                                                             | Biomarkers                                           | Liu         | 2013 | observ | diagnostic | 1  | 109 | cardiac surgery                                                             | AKIN  | 26  |
| Urinary TIMP-2 and IGFBP7 as early biomarkers of acute kidney injury and renal recovery following cardiac surgery.                                                                                  | PLOS one                                             | Meersch     | 2014 | observ | diagnostic | 1  | 50  | cardiac surgery with CPB                                                    | KDIGO | 26  |
| Perioperative heart-type fatty acid binding protein is associated with acute kidney injury after cardiac surgery.                                                                                   | Kidney International                                 | Schaub      | 2015 | observ | diagnostic | 6  | 959 | cardiac surgery                                                             | AKIN  | 330 |
| Urinary liver-type fatty acid-binding protein level as a predictive biomarker of contrast-induced acute kidney injury.                                                                              | european journal of clinical investigation           | Manabe      | 2012 | observ | diagnostic | 1  | 220 | patients with CKD scheduled to undergo coronary angiography or intervention | Other | 19  |
| Urinary neutrophil gelatinase-associated lipocalin: a useful biomarker for tacrolimus-induced acute kidney injury in liver transplant patients.                                                     | PLOS one                                             | Tsuchimoto  | 2014 | observ | diagnostic | 1  | 31  | living donor liver transplantation                                          | AKIN  | 20  |
| Plasma neutrophil gelatinase-associated lipocalin (NGAL) and plasma cystatin C (CysC) as biomarker of acute kidney injury after cardiac surgery.                                                    | Saudi Journal of kidney diseases and transplantation | Ghonemy     | 2014 | observ | diagnostic | 1  | 50  | cardiac surgery                                                             | RIFLE | 17  |
| Plasma NGAL predicts early acute kidney injury no earlier than s-creatinine or cystatin C in severely burned patients.                                                                              | Burns                                                | Rakkolainen | 2016 | observ | diagnostic | 1  | 19  | burn patients with >20%TBSA                                                 | AKIN  | 9   |
| TIMP2*IGFBP7 biomarker panel accurately predicts acute kidney injury in high-risk surgical patients.                                                                                                | the journal of trauma and acute care surgery         | Gunnerson   | 2016 | observ | diagnostic | 58 | 375 | surgical patients                                                           | KDIGO | 35  |

|                                                                                                                                                                                                                                                                     |                                                            |              |      |        |            |    |     |                                    |       |     |
|---------------------------------------------------------------------------------------------------------------------------------------------------------------------------------------------------------------------------------------------------------------------|------------------------------------------------------------|--------------|------|--------|------------|----|-----|------------------------------------|-------|-----|
| Serum neutrophil gelatinase associated lipocalin (NGAL) and cystatin C as early predictors of contrast-induced acute kidney injury in patients undergoing percutaneous coronary intervention.                                                                       | Clinica Chimica Acta                                       | Padhy        | 2014 | observ | diagnostic | 1  | 60  | percutaneous coronary intervention | Other | 30  |
| Urine IL-18, NGAL, IL-8 and serum IL-8 are biomarkers of acute kidney injury following liver transplantation.                                                                                                                                                       | BMC nephrology                                             | Sirota       | 2013 | observ | diagnostic | 2  | 40  | liver transplantation              | Other | 7   |
| Distinct injury markers for the early detection and prognosis of incident acute kidney injury in critically ill adults with preserved kidney function.                                                                                                              | Kidney International                                       | Siew         | 2013 | observ | diagnostic | 1  | 372 | ICU patients                       | AKIN  | 127 |
| Spot urine albumin to creatinine ratio outperforms novel acute kidney injury biomarkers in patients with acute myocardial infarction.                                                                                                                               | international journal of Cardiology                        | Tziakas      | 2015 | observ | diagnostic | 3  | 805 | acute myocardial infarction        | AKIN  | 118 |
| Assessment of biochemical markers in the early post-burn period for predicting acute kidney injury and mortality in patients with major burn injury: comparison of serum creatinine, serum cystatin-C, plasma and urine neutrophil gelatinase-associated lipocalin. | critical care                                              | Yang         | 2014 | observ | diagnostic | 1  | 90  | burn patients with >20%TBSA        | RIFLE | 55  |
| Comparative analysis of urinary biomarkers for early detection of acute kidney injury following cardiopulmonary bypass.                                                                                                                                             | Biomarkers                                                 | Liangos      | 2009 | observ | diagnostic | 2  | 103 | cardiac surgery with CPB           | AKIN  | 13  |
| Improved performance of urinary biomarkers of acute kidney injury in the critically ill by stratification for injury duration and baseline renal function.                                                                                                          | Kidney International                                       | Endre        | 2011 | observ | diagnostic | 2  | 528 | ICU patients                       | KDIGO | 147 |
| Comparison of Neutrophil Gelatinase-Associated Lipocalin Versus B-Type Natriuretic Peptide and Cystatin C to Predict Early Acute Kidney Injury and Outcome in Patients With Acute Heart Failure.                                                                    | the american journal of cardiology                         | Palazzuoli A | 2015 | observ | diagnostic | 1  | 203 | acute heart failure                | AKIN  | 78  |
| The use of plasma and urine neutrophil gelatinase associated lipocalin (NGAL) and Cystatin C in early diagnosis of septic acute kidney injury in critically ill patients.                                                                                           | disease markers                                            | Aydogdu      | 2013 | observ | diagnostic | 1  | 151 | ICU patients                       | RIFLE | 63  |
| Validation of cell-cycle arrest biomarkers for acute kidney injury using clinical adjudication.                                                                                                                                                                     | American Journal of respiratory and Critical Care Medicine | Bihorac      | 2014 | observ | diagnostic | 23 | 408 | ICU patients                       | Other | 71  |
| Diagnostic value of neutrophil gelatinase-associated lipocalin, cystatin C, and soluble triggering receptor expressed on myeloid cells-1 in critically ill patients with sepsis-associated acute kidney injury.                                                     | critical care                                              | Dai          | 2015 | observ | diagnostic | 1  | 112 | ICU patients with sepsis           | KDIGO | 55  |
| Evaluation of new acute kidney injury biomarkers in a mixed intensive care unit.                                                                                                                                                                                    | critical care medicine                                     | Doi          | 2011 | observ | diagnostic | 1  | 339 | ICU patients                       | RIFLE | 131 |
| Acute kidney injury biomarkers for patients in a coronary care unit: a prospective cohort study.                                                                                                                                                                    | PLOS one                                                   | Chen         | 2012 | observ | diagnostic | 1  | 150 | coronary care unit patients        | AKIN  | 43  |

|                                                                                                                                                                    |                                                                          |                    |      |        |            |    |      |                                                               |       |     |
|--------------------------------------------------------------------------------------------------------------------------------------------------------------------|--------------------------------------------------------------------------|--------------------|------|--------|------------|----|------|---------------------------------------------------------------|-------|-----|
| Urinary biomarkers in the clinical prognosis and early detection of acute kidney injury.                                                                           | clinical journal of the American Society of Nephrology                   | Koyner             | 2010 | observ | diagnostic | 1  | 122  | cardiac surgery                                               | AKIN  | 46  |
| Urinary liver-type fatty acid-binding protein linked with increased risk of acute kidney injury after allogeneic stem cell transplantation.                        | biology of blood and Marow transplantation                               | Shingai            | 2014 | observ | diagnostic | 1  | 84   | allogenic stem cell transplantation recieipient               | AKIN  | 32  |
| Urine neutrophil gelatinase-associated lipocalin and interleukin-18 predict acute kidney injury after cardiac surgery.                                             | Renal Failure                                                            | Xin                | 2008 | observ | diagnostic | 1  | 33   | cardiac surgery                                               | AKIN  | 9   |
| Assessment of urinary kidney injury molecule-1 and interleukin-18 in the early post-burn period to predict acute kidney injury for various degrees of burn injury. | BMC nephrology                                                           | Ren                | 2015 | observ | diagnostic | 1  | 95   | burn patients                                                 | KDIGO | 11  |
| Hsp72 is a novel biomarker to predict acute kidney injury in critically ill patients.                                                                              | PLOS one                                                                 | Morales-Buenrostro | 2014 | observ | diagnostic | 1  | 37   | ICU patients                                                  | AKIN  | 17  |
| Comparison of Cystatin C and NGAL in Early Diagnosis of Acute Kidney Injury After Heart Transplantation.                                                           | Annals of transplantation                                                | Hoskova            | 2016 | observ | diagnostic | 1  | 117  | Heart Transplantation                                         | KDIGO | 30  |
| Neutrophil gelatinase-associated lipocalin (NGAL) for the early detection of contrast-induced nephropathy after percutaneous coronary intervention.                | Scandinavian journal of Clinical and Laboratory Investigation            | liebetrau          | 2014 | observ | diagnostic | 1  | 128  | percutaneous coronary intervention                            | KDIGO | 14  |
| Derivation and validation of cutoffs for clinical use of cell cycle arrest biomarkers.                                                                             | Nephrology Dialyse transplantation                                       | Hoste              | 2014 | observ | diagnostic | 41 | 153  | ICU patients                                                  | KDIGO | 27  |
| Quantification of urinary TIMP-2 and IGFBP-7: an adequate diagnostic test to predict acute kidney injury after cardiac surgery?                                    | Critical care                                                            | Wetz               | 2015 | observ | diagnostic | 1  | 42   | coronary artery bypass graft surgery                          | KDIGO | 16  |
| Discovery and validation of cell cycle arrest biomarkers in human acute kidney injury.                                                                             | Critical care                                                            | Kashani            | 2013 | observ | diagnostic | 35 | 728  | ICU patients                                                  | KDIGO | 101 |
| Predictive value of urine interleukin-18 in the evolution and outcome of acute kidney injury in critically ill adult patients.                                     | BJA                                                                      | Nisula             | 2015 | observ | diagnostic | 1  | 1210 | ICU patients                                                  | KDIGO | 268 |
| Time of injury affects urinary biomarker predictive values for acute kidney injury in critically ill, non-septic patients.                                         | BMC nephrology                                                           | de Geus            | 2013 | observ | diagnostic | 1  | 481  | ICU patients                                                  | AKIN  | 49  |
| The clinical utility window for acute kidney injury biomarkers in the critically ill.                                                                              | critical care                                                            | Ralib AM           | 2014 | observ | diagnostic | 1  | 77   | ICU patients                                                  | KDIGO | 26  |
| Usefulness of urinary biomarkers in early detection of acute kidney injury after cardiac surgery in adults.                                                        | circulation journal official journal of the japanese Circulation Society | Matsui             | 2012 | observ | diagnostic | 1  | 85   | cardiac surgery                                               | AKIN  | 48  |
| Urinary neutrophil gelatinase-associated lipocalin levels predict cisplatin-induced acute kidney injury better than albuminuria or urinary cystatin C levels.      | Kaohsiung Journal of Medical Sciences                                    | Lin                | 2013 | observ | diagnostic | 1  | 33   | cancer patients (head and neck, oesophageal or thymic cancer) | RIFLE | 10  |
| Postoperative biomarkers predict acute kidney injury and poor outcomes after adult cardiac surgery.                                                                | journal of the American Society of                                       | Parikh             | 2011 | observ | diagnostic | 6  | 1219 | cardiac surgery                                               | RIFLE | 60  |

|                                                                                                                                                                               |                                                                          |             |      |        |            |   |     |                                                                                                          |       |     |
|-------------------------------------------------------------------------------------------------------------------------------------------------------------------------------|--------------------------------------------------------------------------|-------------|------|--------|------------|---|-----|----------------------------------------------------------------------------------------------------------|-------|-----|
|                                                                                                                                                                               | Nephrology                                                               |             |      |        |            |   |     |                                                                                                          |       |     |
| Diagnostic performance of urinary kidney injury molecule-1 and neutrophil gelatinase-associated lipocalin for acute kidney injury in an obstructive nephropathy patient.      | Nephrology                                                               | Xue         | 2014 | observ | diagnostic | 1 | 90  | surgically proven obstructive nephropathy.                                                               | AKIN  | 54  |
| Urinary kidney injury molecule-1 and monocyte chemotactic protein-1 are noninvasive biomarkers of cisplatin-induced nephrotoxicity in lung cancer patients.                   | cancer chemotherapy and pharmacology                                     | Shinke      | 2015 | observ | diagnostic | 1 | 42  | patient with lung cancer                                                                                 | Other | 30  |
| Combination of Urinary Biomarkers Improves Early Detection of Acute Kidney Injury in Patients With Heart Failure.                                                             | circulation journal official journal of the japanese Circulation Society | Yang        | 2016 | observ | diagnostic | 1 | 103 | acute decompensated heart failure                                                                        | KDIGO | 49  |
| Serum heart-type fatty acid-binding protein level can be used to detect acute kidney injury on admission and predict an adverse outcome in patients with acute heart failure. | circulation journal official journal of the japanese Circulation Society | Shirakabe   | 2015 | observ | diagnostic | 1 | 282 | acute heart failure                                                                                      | RIFLE | 69  |
| Comparison of Plasma and Urine Biomarker Performance in Acute Kidney Injury.                                                                                                  | PLOS one                                                                 | Schley      | 2015 | observ | diagnostic | 1 | 110 | cardiac surgery with CPB                                                                                 | AKIN  | 37  |
| Urinary liver-type fatty acid-binding protein predicts adverse outcomes in acute kidney injury.                                                                               | Kidney International                                                     | Ferguson    | 2010 | observ | diagnostic | 1 | 160 | AKI versus control (healthy volunteers, pre cardiac catheterization patients, ICU patients without AKI)  | RIFLE | 92  |
| Urinary biomarkers for sensitive and specific detection of acute kidney injury in humans.                                                                                     | clinical and translational science                                       | Vaidya      | 2008 | observ | diagnostic | 1 | 204 | AKI versus control ( healthy volunteers, pre cardiac catheterization patients, ICU patients without AKI) | RIFLE | 102 |
| Urinary glutathione S-transferase as an early marker for renal dysfunction in patients admitted to intensive care with sepsis.                                                | critical care and resuscitation                                          | Walshe      | 2009 | observ | diagnostic | 1 | 38  | ICU patients with sepsis                                                                                 | AKIN  | 19  |
| Neutrophil Gelatinase-Associated Lipocalin (NGAL) predicts renal injury in acute decompensated cardiac failure: a prospective observational study.                            | BMC cardiovascular disorders                                             | Macdonald S | 2012 | observ | diagnostic | 2 | 90  | acute decompensated heart failure                                                                        | RIFLE | 22  |
| Plasma NGAL for the diagnosis of AKI in patients admitted from the emergency department setting                                                                               | clinical journal of the American Society of Nephrology                   | Soto        | 2013 | observ | diagnostic | 1 | 616 | emergency department patients                                                                            | RIFLE | 130 |
| Urinary IL-18 is an early predictive biomarker of acute kidney injury after cardiac surgery.                                                                                  | Kidney International                                                     | Parikh      | 2005 | observ | diagnostic | 1 | 138 | ICU patients with acute lung injury                                                                      | Other | 52  |

|                                                                                                                                                                                                                       |                                                               |            |      |        |            |    |     |                                                                                                    |       |    |
|-----------------------------------------------------------------------------------------------------------------------------------------------------------------------------------------------------------------------|---------------------------------------------------------------|------------|------|--------|------------|----|-----|----------------------------------------------------------------------------------------------------|-------|----|
| Neutrophil gelatinase-associated lipocalin (NGAL) for the early detection of cardiac surgery associated acute kidney injury.                                                                                          | Scandinavian journal of Clinical and Laboratory Investigation | liebetrau  | 2013 | observ | diagnostic | 1  | 141 | cardiac surgery                                                                                    | KDIGO | 47 |
| Neutrophil Gelatinase Associated Lipocalin (NGAL) in Leptospirosis Acute Kidney Injury: A Multicenter Study in Thailand.                                                                                              | PLOS one                                                      | Srisawat   | 2015 | observ | diagnostic | 9  | 206 | patients suspects de leptospirosis                                                                 | KDIGO | 55 |
| Plasma neutrophil gelatinase-associated lipocalin as a predictive biomarker for the detection of acute kidney injury in adult poisoning.                                                                              | clinical toxicology                                           | Ahn        | 2016 | observ | diagnostic | 1  | 157 | acute poisoning presenting in the emergency department                                             | AKIN  | 23 |
| The identification of three novel biomarkers of major adverse kidney events.                                                                                                                                          | Biomarkers in Medicine                                        | Haase      | 2014 | observ | diagnostic | NR | 100 | cardiac surgery                                                                                    | RIFLE | 23 |
| Serum neutrophil gelatinase-associated lipocalin (NGAL) in predicting worsening renal function in acute decompensated heart failure.                                                                                  | Journal of Cardiac failure                                    | Aghel      | 2010 | observ | diagnostic | 1  | 91  | acute decompensated heart failure                                                                  | AKIN  | 35 |
| Urinary netrin-1 and KIM-1 as early biomarkers for septic acute kidney injury.                                                                                                                                        | Renal Failure                                                 | Tu         | 2014 | observ | diagnostic | 1  | 150 | ICU patients with sepsis                                                                           | AKIN  | 49 |
| Urinary neutrophil gelatinase-associated lipocalin to hepcidin ratio as a biomarker of acute kidney injury in intensive care unit patients.                                                                           | minerva anesthesiologica                                      | Martensson | 2015 | observ | diagnostic | 1  | 102 | ICU patients                                                                                       | RIFLE | 54 |
| Neutrophil gelatinase--associated lipocalin predicts acute kidney injury in patients undergoing liver transplantation.                                                                                                | Liver transplantation                                         | Portal     | 2010 | observ | diagnostic | 1  | 80  | liver transplantation                                                                              | AKIN  | 30 |
| A Prospective Study of the Timing and Accuracy of Neutrophil Gelatinase-Associated Lipocalin Levels in Predicting Acute Kidney Injury in High-Risk Cardiac Surgery Patients.                                          | Journal of cardiothoracic and vascular anesthesia             | Fanning    | 2016 | observ | diagnostic | 1  | 50  | cardiac surgery                                                                                    | KDIGO | 31 |
| Urinary neutrophil gelatinase-associated lipocalin (NGAL) as an early marker of acute kidney injury in critically ill multiple trauma patients.                                                                       | Clinical chemistry and laboratory medicine                    | Makris     | 2009 | observ | diagnostic | 1  | 31  | Trauma                                                                                             | RIFLE | 11 |
| Plasma neutrophil gelatinase-associated lipocalin as an early predicting biomarker of acute kidney injury and clinical outcomes after recovery of spontaneous circulation in out-of-hospital cardiac arrest patients. | Resuscitation                                                 | Park       | 2016 | observ | diagnostic | 1  | 54  | recovery of spontaneous circulation (ROSC) in patients with out-of-hospital cardiac arrest (OHCA). | AKIN  | 26 |
| Combined biomarker analysis for risk of acute kidney injury in patients with ST-segment elevation myocardial infarction.                                                                                              | PLOS one                                                      | Tung       | 2015 | observ | diagnostic | 1  | 189 | ST elevation myocardial infarction (STEMI) undergoing percutaneous coronary intervention           | AKIN  | 37 |

|                                                                                                                                                                                                       |                                                        |               |      |        |            |   |      |                                                                                                                                            |       |    |
|-------------------------------------------------------------------------------------------------------------------------------------------------------------------------------------------------------|--------------------------------------------------------|---------------|------|--------|------------|---|------|--------------------------------------------------------------------------------------------------------------------------------------------|-------|----|
| Neutrophil gelatinase-associated lipocalin and albuminuria as predictors of acute kidney injury in patients treated with goal-directed haemodynamic therapy after major abdominal surgery             | Annals of Clinical Biochemistry                        | Cullen        | 2014 | observ | diagnostic | 1 | 109  | perioperative patients admitted to a critical care unit after major abdominal surgery and treated with goal-directed haemodinamics therapy | AKIN  | 17 |
| Plasma Neutrophil Gelatinase-Associated Lipocalin (NGAL) predicts acute kidney injury in septic shock at ICU admission].                                                                              | Annales francaises d'anesthesie reanimation            | Camou         | 2013 | observ | diagnostic | 1 | 50   | ICU patients with septic choc                                                                                                              | RIFLE | 43 |
| Whole blood neutrophil gelatinase-associated lipocalin predicts acute kidney injury in burn patients.                                                                                                 | Journal of surgical research                           | Sen           | 2015 | observ | diagnostic | 1 | 30   | burn patients with >20%TBSA                                                                                                                | RIFLE | 14 |
| Novel biomarkers for the prediction of acute kidney injury in patients undergoing liver transplantation.                                                                                              | Biomarkers in Medicine                                 | Dedeoglu      | 2013 | observ | diagnostic | 1 | 26   | liver transplantation                                                                                                                      | AKIN  | 9  |
| Novel and conventional serum biomarkers predicting acute kidney injury in adult cardiac surgery--a prospective cohort study.                                                                          | Critical care medicine                                 | Haase-Fielitz | 2009 | observ | diagnostic | 1 | 100  | cardiac surgery with CPB                                                                                                                   | Other | 23 |
| Neutrophil Gelatinase-Associated Lipocalin and Contrast-Induced Acute Kidney Injury.                                                                                                                  | Circulation cardiovascular interventions               | Quintavalle   | 2015 | interv | diagnostic | 4 | 458  | patients with chronic kidney disease, referred to our institutions for coronary and/or peripheral procedures                               | AKIN  | 64 |
| Urinary biomarkers in the early detection of acute kidney injury after cardiac surgery.                                                                                                               | Clinical Journal of the American Society of Nephrology | Han           | 2009 | observ | diagnostic | 1 | 90   | cardiac surgery                                                                                                                            | AKIN  | 36 |
| Usefulness of plasma neutrophil gelatinase-associated lipocalin as an early marker of acute kidney injury after cardiopulmonary bypass in Korean cardiac patients: a prospective observational study. | Clinical Biochemistry                                  | Park          | 2015 | observ | diagnostic | 1 | 112  | cardiac surgery with CPB                                                                                                                   | RIFLE | 13 |
| Plasma and urine neutrophil gelatinase-associated lipocalin in the diagnosis of new onset acute kidney injury in critically ill patients.                                                             | Critical care                                          | Matsa         | 2014 | observ | diagnostic | 1 | 194  | ICU patients                                                                                                                               | RIFLE | 59 |
| Levels of protein C and soluble thrombomodulin in critically ill patients with acute kidney injury: a multicenter prospective observational study.                                                    | PLOS one                                               | Bouchard      | 2015 | observ | diagnostic | 3 | 80   | ICU patients                                                                                                                               | AKIN  | 56 |
| Diagnostic and prognostic stratification in the emergency department using urinary biomarkers of nephron damage: a multicenter prospective cohort study.                                              | Journal of the American College of Cardiology          | Nickolas      | 2012 | observ | diagnostic | 3 | 1635 | emergency department patients                                                                                                              | RIFLE | 96 |
| Serum cystatin C and microalbuminuria in burn patients with acute kidney injury.                                                                                                                      | European Journal of Clinical Investigation             | Yim           | 2015 | observ | diagnostic | 1 | 97   | burn patients                                                                                                                              | AKIN  | 40 |



|                                                                                                                                                                                  |                                                               |            |      |        |            |    |      |                                                                                                                              |       |     |
|----------------------------------------------------------------------------------------------------------------------------------------------------------------------------------|---------------------------------------------------------------|------------|------|--------|------------|----|------|------------------------------------------------------------------------------------------------------------------------------|-------|-----|
| Urinary interleukin-18 does not predict acute kidney injury after adult cardiac surgery: a prospective observational cohort study.                                               | critical care                                                 | Haase      | 2008 | observ | diagnostic | 1  | 100  | cardiac surgery with CPB                                                                                                     | RIFLE | 50  |
| Plasma neutrophil gelatinase-associated lipocalin in acute kidney injury superimposed on chronic kidney disease after cardiac surgery: a multicenter prospective study.          | critical care                                                 | Doi        | 2013 | observ | diagnostic | 2  | 68   | cardiac surgery avec IRC preop                                                                                               | AKIN  | 33  |
| Plasma neutrophil gelatinase-associated lipocalin in acute kidney injury superimposed on chronic kidney disease after cardiac surgery: a multicenter prospective study.          | critical care                                                 | Doi        | 2013 | observ | diagnostic | 2  | 78   | cardiac surgery                                                                                                              | AKIN  | 20  |
| Pulse wave velocity and neutrophil gelatinase-associated lipocalin as predictors of acute kidney injury following aortic valve replacement.                                      | Journal of cardiothoracic Surgery                             | Kidher     | 2014 | observ | diagnostic | 1  | 53   | aortic valve replacement                                                                                                     | RIFLE | 16  |
| Urine neutrophil gelatinase-associated lipocalin levels predict acute kidney injury in acute decompensated heart failure patients.                                               | Renal Failure                                                 | Soyler     | 2015 | observ | diagnostic | 1  | 100  | acute heart failure                                                                                                          | AKIN  | 19  |
| Elevated urinary IL-18 levels at the time of ICU admission predict adverse clinical outcomes.                                                                                    | clinical journal of the american society of nephrology        | Siew       | 2010 | observ | diagnostic | 1  | 451  | ICU patients included in the NIH-sponsored VALID study                                                                       | AKIN  | 86  |
| Serum and urine cystatin C are poor biomarkers for acute kidney injury and renal replacement therapy.                                                                            | Intensive Care Medicine                                       | Royakkers  | 2011 | observ | diagnostic | NR | 151  | ICU patients with expected duration of mechanical ventilation of at least 48h and/or expected length of stay of at least 72h | RIFLE | 35  |
| Can admission serum cystatin C level be an early marker subclinical acute kidney injury in critical care patients?                                                               | Scandinavian journal of Clinical and Laboratory Investigation | Gaygisiz   | 2016 | observ | diagnostic | 1  | 72   | ICU patients                                                                                                                 | RIFLE | 19  |
| Neutrophil gelatinase-associated lipocalin as an early biomarker of acute kidney injury in liver transplantation.                                                                | Clinical transplant                                           | Jeong      | 2012 | observ | diagnostic | 1  | 19   | liver transplantation                                                                                                        | RIFLE | 11  |
| Urinary neutrophil gelatinase-associated lipocalin as a marker of acute kidney injury after orthotopic liver transplantation.                                                    | Nephrology Dialyse transplantation                            | Wagener    | 2011 | observ | diagnostic | 1  | 92   | liver transplantation                                                                                                        | RIFLE | 37  |
| Comparison of urinary neutrophil glucosaminidase-associated lipocalin, cystatin C, and $\alpha$ 1-microglobulin for early detection of acute renal injury after cardiac surgery. | european Journal of cardiothoracic Surgery                    | Heise      | 2011 | observ | diagnostic | 1  | 47   | cardiac surgery with CPB                                                                                                     | AKIN  | 36  |
| Serum cystatin C- versus creatinine-based definitions of acute kidney injury following cardiac surgery: a prospective cohort study.                                              | american Journal of kidney disease                            | Spahillari | 2012 | observ | diagnostic | 6  | 1150 | cardiac surgery with CPB with at least one risk factor for AKI                                                               | Other | 484 |
| The role of neutrophil gelatinase-associated lipocalin in predicting acute kidney injury in patients undergoing off-pump coronary artery bypass graft: A pilot study.            | Annals of Cardiac Anaesthesia                                 | Jain       | 2016 | observ | diagnostic | 1  | 80   | cardiac surgery off-pump coronary artery bypass graft                                                                        | AKIN  | 7   |

|                                                                                                                                                                                    |                                                            |                  |      |        |            |   |     |                                                 |       |     |
|------------------------------------------------------------------------------------------------------------------------------------------------------------------------------------|------------------------------------------------------------|------------------|------|--------|------------|---|-----|-------------------------------------------------|-------|-----|
| Plasma neutrophil gelatinase-associated lipocalin for the prediction of acute kidney injury in acute heart failure.                                                                | Critical care                                              | Breidthardt      | 2012 | observ | diagnostic | 1 | 207 | acute heart failure in the emergency department | AKIN  | 60  |
| Plasma neutrophil gelatinase-associated lipocalin as a biomarker for acute kidney injury in critically ill patients with suspected sepsis.                                         | Clinical Biochemistry                                      | Kim              | 2013 | observ | diagnostic | 1 | 231 | ICU patients with sepsis                        | AKIN  | 18  |
| Neutrophil gelatinase-associated lipocalin at ICU admission predicts for acute kidney injury in adult patients.                                                                    | American Journal of respiratory and Critical Care Medicine | de Geus          | 2011 | observ | diagnostic | 1 | 632 | ICU patients                                    | RIFLE | 171 |
| Cystatin C is a biomarker for predicting acute kidney injury in patients with acute-on-chronic liver failure.                                                                      | World Journal of Gastroenterology                          | Wan              | 2013 | observ | diagnostic | 1 | 86  | acute on chronic liver failure                  | AKIN  | 8   |
| Urinary hepcidin-25 and risk of acute kidney injury following cardiopulmonary bypass.                                                                                              | clinical journal of the American Society of Nephrology     | Ho               | 2011 | observ | diagnostic | 1 | 338 | cardiac surgery with CPB                        | Other | 28  |
| Cystatin C as a marker of acute kidney injury in the emergency department.                                                                                                         | clinical journal of the American Society of Nephrology     | Soto             | 2010 | observ | diagnostic | 1 | 616 | emergency department patients                   | RIFLE | 130 |
| The clinical utility of plasma neutrophil gelatinase-associated lipocalin in acute kidney injury.                                                                                  | Blood purification                                         | Pickering        | 2013 | observ | diagnostic | 2 | 528 | ICU patients                                    | KDIGO | 360 |
| Neutrophil gelatinase-associated lipocalin in adult septic patients with and without acute kidney injury.                                                                          | Intensive Care Medicine                                    | Martensson       | 2010 | observ | diagnostic | 1 | 45  | ICU patients with SIRS or septic choc           | RIFLE | 18  |
| Urine neutrophil gelatinase associated lipocalin as an early marker of acute kidney injury in hematopoietic stem cell transplantation patients.                                    | Renal Failure                                              | Taghizadeh-ghehi | 2015 | interv | diagnostic | 1 | 72  | hematopoietic stem cell transplantation         | AKIN  | 12  |
| Urine neutrophil gelatinase-associated lipocalin as a marker of acute kidney injury after kidney surgery.                                                                          | the Journal of Urology                                     | Sprenkle         | 2013 | observ | diagnostic | 1 | 162 | renal surgery and thoracic surgery              | AKIN  | 36  |
| Urinary neutrophil gelatinase-associated lipocalin predicts kidney outcome and death in patients with cirrhosis and bacterial infections.                                          | journal of Hepatology                                      | Barreto          | 2014 | observ | diagnostic | 1 | 132 | Patients with Cirrhosis and bacterial infection | AKIN  | 65  |
| Influence of severity of illness on neutrophil gelatinase-associated lipocalin performance as a marker of acute kidney injury: a prospective cohort study of patients with sepsis. | BMC nephrology                                             | Vanmassenhove    | 2015 | observ | diagnostic | 1 | 107 | patients with sepsis                            | RIFLE | 79  |
| Sensitivity and specificity of a single emergency department measurement of urinary neutrophil gelatinase-associated lipocalin for diagnosing acute kidney injury.                 | Annales of internal Medicine                               | Nickolas         | 2008 | observ | diagnostic | 1 | 635 | emergency department patients                   | RIFLE | 30  |
| Serum Cystatin C for the Diagnosis of Acute Kidney Injury in Patients Admitted in the Emergency Department.                                                                        | disease markers                                            | Bongiovanni      | 2015 | observ | diagnostic | 1 | 198 | emergency department patients                   | RIFLE | 33  |
| Combination of renal biomarkers predicts acute kidney injury in critically ill adults.                                                                                             | Renal Failure                                              | Kokkoris         | 2012 | observ | diagnostic | 1 | 100 | ICU patients                                    | RIFLE | 36  |

|                                                                                                                                                                                                            |                                                                          |            |      |        |            |    |      |                                                                                   |       |     |
|------------------------------------------------------------------------------------------------------------------------------------------------------------------------------------------------------------|--------------------------------------------------------------------------|------------|------|--------|------------|----|------|-----------------------------------------------------------------------------------|-------|-----|
| Preoperative serum cystatin C combined with dipstick proteinuria predicts acute kidney injury after cardiac surgery.                                                                                       | Renal Failure                                                            | Wang       | 2014 | observ | diagnostic | 1  | 616  | cardiac surgery                                                                   | AKIN  | 179 |
| Predicting cisplatin-induced acute kidney injury by urinary neutrophil gelatinase-associated lipocalin excretion: a pilot prospective case-control study.                                                  | Nephron clinical Practice                                                | Gaspari    | 2010 | observ | diagnostic | 1  | 24   | non small cell lung cancer or head and neck cancer                                | Other | 12  |
| Perioperative plasma neutrophil gelatinase-associated lipocalin measurement in patients who undergo left ventricular assist device implantation surgery.                                                   | circulation journal official journal of the japanese Circulation Society | Sumida     | 2014 | observ | diagnostic | 1  | 31   | left ventricular assist device implatation surgery                                | KDIGO | 17  |
| Additive value of blood neutrophil gelatinase-associated lipocalin to clinical judgement in acute kidney injury diagnosis and mortality prediction in patients hospitalized from the emergency department. | Critical care                                                            | Di Somma   | 2013 | observ | diagnostic | 3  | 665  | emergency department patients                                                     | RIFLE | 49  |
| Urinary cystatin C and acute kidney injury after cardiac surgery.                                                                                                                                          | american Journal of kidney disease                                       | Koyner     | 2013 | observ | diagnostic | 6  | 1203 | cardiac surgery                                                                   | AKIN  | 416 |
| Urinary Neutrophil Gelatinase-Associated Lipocalin predicts the severity of contrast-induced acute kidney injury in chronic kidney disease patients undergoing elective coronary procedures.               | BMC nephrology                                                           | Tasanarong | 2013 | observ | diagnostic | 1  | 130  | chronic kidney disease (GFR<60ml/min) who underwent elective coronary angiography | KDIGO | 16  |
| The diagnostic accuracy of plasma neutrophil gelatinase-associated lipocalin in the prediction of acute kidney injury in emergency department patients with suspected sepsis.                              | Annals of emergency Medicine                                             | Shapiro    | 2010 | observ | diagnostic | 10 | 661  | emergency department patients with suspected sepsis (2/4 SIRS)                    | Other | 24  |
| Early postoperative serum cystatin C predicts severe acute kidney injury following cardiac surgery: a post-hoc analysis of a randomized controlled trial.                                                  | Journal of cardiothoracic Surgery                                        | Kiessling  | 2014 | interv | diagnostic | 1  | 70   | cardiac surgery with CPB                                                          | AKIN  | 21  |
| Plasma neutrophil gelatinase-associated lipocalin is an early biomarker for acute kidney injury in an adult ICU population.                                                                                | Intensive Care Medicine                                                  | Cruz       | 2010 | observ | diagnostic | 1  | 301  | ICU patients                                                                      | RIFLE | 133 |
| Serum and urinary biomarkers for predicting acute kidney injury after partial nephrectomy.                                                                                                                 | Clinical and investigative medicine                                      | Chen       | 2015 | observ | diagnostic | 1  | 89   | partial nephrectomy                                                               | AKIN  | 28  |
| Predictive value of NGAL for use of renal replacement therapy in patients with severe sepsis.                                                                                                              | ACTA anaesthesiologica Scandinavica                                      | Hjortrup   | 2014 | observ | diagnostic | 3  | 222  | ICU patients with severe sepsis                                                   | KDIGO | 31  |
| Presurgical serum cystatin C and risk of acute kidney injury after cardiac surgery.                                                                                                                        | american Journal of kidney disease                                       | Shlipak    | 2011 | observ | diagnostic | 6  | 1147 | cardiac surgery                                                                   | AKIN  | 407 |
| The ratio of plasma neutrophil gelatinase-associated lipocalin predicts acute kidney injury in patients undergoing liver transplantation.                                                                  | Transplantation proceedings                                              | Cheng      | 2012 | observ | diagnostic | 1  | 26   | liver transplantation                                                             | AKIN  | 13  |

|                                                                                                                                                                                                  |                                                        |                |      |        |            |   |     |                                                                                                           |       |    |
|--------------------------------------------------------------------------------------------------------------------------------------------------------------------------------------------------|--------------------------------------------------------|----------------|------|--------|------------|---|-----|-----------------------------------------------------------------------------------------------------------|-------|----|
| Accuracy of plasma neutrophil gelatinase-associated lipocalin in the early diagnosis of contrast-induced acute kidney injury in critical illness.                                                | Intensive Care Medicine                                | Valette        | 2013 | observ | diagnostic | 2 | 98  | critically ill patients with stable creatinine concentration up to 48 h before contrast medium injection  | AKIN  | 30 |
| Plasma cystatin C and acute kidney injury after cardiopulmonary bypass.                                                                                                                          | clinical journal of the American Society of Nephrology | Wald           | 2010 | observ | diagnostic | 3 | 150 | cardiac surgery with CPB                                                                                  | Other | 47 |
| Predicting the development of acute kidney injury in liver cirrhosis--an analysis of glomerular filtration rate, proteinuria and kidney injury biomarkers.                                       | Alimentary Pharmacology and Therapeutics               | Slack          | 2013 | observ | diagnostic | 1 | 34  | cirrhosis                                                                                                 | AKIN  | 18 |
| Is urinary $\gamma$ -glutamyl transpeptidase superior to urinary neutrophil gelatinase-associated lipocalin for early prediction of acute kidney injury after liver transplantation?             | Transplantation proceedings                            | Marcelino      | 2014 | observ | diagnostic | 1 | 61  | liver transplantation                                                                                     | AKIN  | 19 |
| Role of urine neutrophil gelatinase-associated lipocalin in the early diagnosis of amphotericin B-induced acute kidney injury.                                                                   | Antimicrobial Agents and Chemotherapy                  | Rocha          | 2015 | observ | diagnostic | 1 | 24  | initiating treatment with ampho B                                                                         | KDIGO | 17 |
| Plasma neutrophil gelatinase-associated lipocalin and acute postoperative kidney injury in adult cardiac surgical patients.                                                                      | Anesthesia Analgesia                                   | Perry          | 2010 | observ | diagnostic | 2 | 879 | coronary artery bypass graft surgery                                                                      | Other | 75 |
| Subclinical and clinical contrast-induced acute kidney injury: data from a novel blood marker for determining the risk of developing contrast-induced nephropathy (ENCINO), a prospective study. | Renal Failure                                          | Akrawinthawong | 2015 | observ | diagnostic | 3 | 63  | patients with chronic kidney disease scheduled to undergo coronary angiography or intervention            | KDIGO | 8  |
| Preoperative serum h-FABP concentration is associated with postoperative incidence of acute kidney injury in patients undergoing cardiac surgery.                                                | BMC cardiovascular disorders                           | Oezkur         | 2014 | observ | diagnostic | 1 | 70  | cardiac surgery elective CABG surgery or single valve repair/replacement                                  | AKIN  | 45 |
| Urinary Biomarkers Improve the Diagnosis of Intrinsic Acute Kidney Injury in Coronary Care Units.                                                                                                | Medicine                                               | Chang          | 2015 | observ | diagnostic | 1 | 147 | coronary care unit patients who exhibited any of the comorbidities of AKI and any of the kidney stressors | KDIGO | 43 |
| Serum cystatin C as a marker of renal function in patients with acute renal failure.                                                                                                             | Saudi Journal of kidney diseases and transplantation   | Tarif          | 2008 | observ | diagnostic | 1 | 373 | patients diagnosed with ARF at hospitalization versus healthy voloneers                                   | Other | 73 |

|                                                                                                                                                                |                                               |                  |      |        |            |    |     |                                                                               |       |     |
|----------------------------------------------------------------------------------------------------------------------------------------------------------------|-----------------------------------------------|------------------|------|--------|------------|----|-----|-------------------------------------------------------------------------------|-------|-----|
| Changes in renal markers and <b>acute kidney injury</b> after marathon running.                                                                                | nephrology                                    | Mccullough       | 2011 | observ | diagnostic | 1  | 25  | marathon runners                                                              | AKIN  | 10  |
| Plasma neutrophil gelatinase-associated lipocalin is an early marker of acute kidney injury in adult critically ill patients: a prospective study.             | journal of critical care                      | Constantin       | 2010 | observ | diagnostic | 3  | 88  | ICU patients                                                                  | RIFLE | 52  |
| Urine neutrophil gelatinase-associated lipocalin in septic patients with and without acute kidney injury.                                                      | Renal Failure                                 | Fan              | 2014 | observ | diagnostic | 1  | 126 | ICU patients with sepsis                                                      | RIFLE | 58  |
| Serum cystatin C concentration as a marker of acute renal dysfunction in critically ill patients.                                                              | Critical Care                                 | Villa            | 2005 | observ | diagnostic | 1  | 50  | ICU patients                                                                  | Other | 25  |
| Comparison of serum creatinine and cystatin C for early diagnosis of contrast-induced nephropathy after coronary angiography and interventions.                | Clinical chemistry and laboratory medicine    | Ribichini        | 2012 | observ | diagnostic | 1  | 166 | patients underwent coronary angiography and/or angioplasty and at risk of CIN | Other | 30  |
| Urinary Neutrophil Gelatinase-Associated Lipocalin (uNGAL) and contrast-induced acute kidney injury after coronary angiogram.                                  | swiss Medical Weekly                          | Perrin           | 2013 | observ | diagnostic | 1  | 244 | percutaneous coronary intervention                                            | AKIN  | 8   |
| Midkine: a novel and early biomarker of contrast-induced acute kidney injury in patients undergoing percutaneous coronary interventions.                       | BioMed research international                 | Malyszko         | 2015 | observ | diagnostic | 1  | 89  | percutaneous coronary intervention                                            | Other | 9   |
| Early detection of acute renal failure by serum cystatin C.                                                                                                    | Kidney International                          | Herget-Rosenthal | 2004 | observ | diagnostic | 3  | 85  | ICU patients with high risk AKI                                               | RIFLE | 44  |
| Association between increases in urinary neutrophil gelatinase-associated lipocalin and acute renal dysfunction after adult cardiac surgery.                   | Anesthesiology                                | Wagener          | 2006 | observ | diagnostic | 1  | 81  | cardiac surgery                                                               | Other | 16  |
| Urinary cystatin C is diagnostic of acute kidney injury and sepsis, and predicts mortality in the intensive care unit.                                         | critical care                                 | Nejat            | 2010 | observ | diagnostic | 2  | 444 | ICU patients                                                                  | AKIN  | 125 |
| Predictive value of plasma neutrophil gelatinase-associated lipocalin for acute kidney injury in intensive care unit patients after major non-cardiac surgery. | Nephrology                                    | Shum             | 2015 | observ | diagnostic | 1  | 151 | patients admitted to ICU after non cardiac surgical intervention              | AKIN  | 45  |
| Urine neutrophil gelatinase-associated lipocalin moderately predicts acute kidney injury in critically ill adults.                                             | journal of the American Society of Nephrology | Siew             | 2009 | observ | diagnostic | 1  | 451 | ICU patients                                                                  | AKIN  | 86  |
| Markers of renal function and acute kidney injury in acute heart failure: definitions and impact on outcomes of the cardiorenal syndrome.                      | European Heart Journal                        | Lassus           | 2010 | observ | diagnostic | 14 | 292 | acute heart failure                                                           | AKIN  | 46  |
| Proatrial natriuretic peptide (1-98), but not cystatin C, is predictive for occurrence of acute renal insufficiency in critically ill septic patients.         | Nephron clinical Practice                     | Mazul-Sunko      | 2004 | observ | diagnostic | 1  | 29  | ICU patients with sepsis                                                      | Other | 10  |
| Does the kidney injury molecule-1 predict cisplatin-induced kidney injury in early stage?                                                                      | Annals of Clinical Biochemistry               | Tekce            | 2015 | observ | diagnostic | 1  | 22  | patients with solid tumors treated with cisplatin                             | AKIN  | 8   |

|                                                                                                                                                                                                         |                                                        |               |      |        |            |    |      |                                                                                          |       |     |
|---------------------------------------------------------------------------------------------------------------------------------------------------------------------------------------------------------|--------------------------------------------------------|---------------|------|--------|------------|----|------|------------------------------------------------------------------------------------------|-------|-----|
| Using inflammatory and oxidative biomarkers in urine to predict early acute kidney injury in patients undergoing liver transplantation.                                                                 | Biomarkers                                             | Liu           | 2014 | observ | diagnostic | 1  | 28   | liver transplantation                                                                    | RIFLE | 16  |
| Accuracy of Urinary Neutrophil Gelatinase-Associated Lipocalin in Quantifying Acute Kidney Injury after Partial Nephrectomy in Patients with Normal Contralateral Kidney.                               | PLOS one                                               | Koo           | 2015 | observ | diagnostic | 1  | 146  | open or laparoscopic partial nephrectomy for solid renal tumors                          | AKIN  | 34  |
| Fibroblast growth factor-23 and the long-term risk of hospital-associated AKI among community-dwelling older individuals.                                                                               | clinical journal of the American Society of Nephrology | Brown         | 2014 | observ | diagnostic | 4  | 3241 | elderly individuals in the Cardiovascular Health Study.                                  | Other | 119 |
| Relative and absolute changes in urinary neutrophil gelatinase-associated lipocalin and correlation with small increases in serum creatinine levels after coronary angiography: an observational study. | Nephron clinical Practice                              | Souza         | 2015 | observ | diagnostic | 1  | 125  | elective coronary angiography to diagnose ischemic heart disease.                        | AKIN  | 22  |
| Sepsis and AKI in Clinical Emergency Room Patients: The Role of Urinary NGAL.                                                                                                                           | BioMed research international                          | Si Nga        | 2015 | observ | diagnostic | 1  | 168  | septic patients admitted to the emergency room                                           | AKIN  | 121 |
| Analysis of biomarkers for risk of acute kidney injury after primary angioplasty for acute ST-segment elevation myocardial infarction: results of the HORIZONS-AMI trial.                               | Catheterization and Cardiovascular Interventions       | Guerchicoff   | 2015 | interv | diagnostic | NR | 390  | ST elevation myocardial infarction (STEMI) undergoing percutaneous coronary intervention | Other | 56  |
| Urinary excretion of twenty peptides forms an early and accurate diagnostic pattern of acute kidney injury.                                                                                             | Kidney International                                   | Metzger       | 2010 | observ | diagnostic | 3  | 20   | ICU patients                                                                             | AKIN  | 9   |
| Urinary excretion of twenty peptides forms an early and accurate diagnostic pattern of acute kidney injury.                                                                                             | Kidney International                                   | Metzger       | 2010 | observ | diagnostic | 3  | 38   | allogenic stem cell transplantation reciepiant                                           | AKIN  | 16  |
| Urinary macrophage migration inhibitory factor serves as a potential biomarker for acute kidney injury in patients with acute pyelonephritis.                                                           | Mediators of inflammation                              | Hong          | 2012 | observ | diagnostic | 1  | 39   | acute pyelonephritis                                                                     | RIFLE | 13  |
| Plasma IL-6 and IL-10 Concentrations Predict AKI and Long-Term Mortality in Adults after Cardiac Surgery.                                                                                               | journal of the American Society of Nephrology          | Zhang         | 2015 | observ | diagnostic | 6  | 960  | cardiac surgery                                                                          | AKIN  | 330 |
| Urinary chitinase 3-like protein 1 for early diagnosis of acute kidney injury: a prospective cohort study in adult critically ill patients.                                                             | Critical Care                                          | De Loor       | 2016 | observ | diagnostic | 1  | 181  | ICU patients                                                                             | KDIGO | 6   |
| A Pilot Study Identifying a Set of microRNAs As Precise Diagnostic Biomarkers of Acute Kidney Injury.                                                                                                   | PLOS one                                               | Aguado-Fraile | 2015 | observ | diagnostic | 1  | 55   | ICU patients                                                                             | AKIN  | 35  |
| A Pilot Study Identifying a Set of microRNAs As Precise Diagnostic Biomarkers of Acute Kidney Injury.                                                                                                   | PLOS one                                               | Aguado-Fraile | 2015 | observ | diagnostic | 1  | 31   | cardiac surgery                                                                          | AKIN  | 17  |

|                                                                                                                                                                                                              |                                                                          |               |      |        |            |    |      |                                                                                          |       |      |
|--------------------------------------------------------------------------------------------------------------------------------------------------------------------------------------------------------------|--------------------------------------------------------------------------|---------------|------|--------|------------|----|------|------------------------------------------------------------------------------------------|-------|------|
| Urinary Angiotensinogen Level Predicts AKI in Acute Decompensated Heart Failure: A Prospective, Two-Stage Study.                                                                                             | journal of the American Society of Nephrology                            | Yang          | 2015 | observ | diagnostic | 4  | 317  | acute decompensated heart failure                                                        | KDIGO | 104  |
| The Preinterventional Cystatin-Creatinine-Ratio: A Prognostic Marker for Contrast Medium-Induced Acute Kidney Injury and Long-Term All-Cause Mortality.                                                      | Nephron clinical Practice                                                | Luders        | 2015 | observ | diagnostic | 1  | 373  | elective left heart catheterization                                                      | AKIN  | 79   |
| Urine hepcidin has additive value in ruling out cardiopulmonary bypass-associated acute kidney injury: an observational cohort study.                                                                        | Critical Care                                                            | Haase-Fielitz | 2011 | interv | diagnostic | NR | 100  | cardiac surgery with CPB with at least one risk factor for AKI                           | RIFLE | 9    |
| Predictive and pathogenetic value of plasma biomarkers for acute kidney injury in patients with acute lung injury.                                                                                           | critical care medicine                                                   | Liu           | 2007 | interv | diagnostic | 10 | 876  | ICU patients with acute lung injury                                                      | RIFLE | 209  |
| Advanced oxidation protein products in predicting acute kidney injury following cardiac surgery.                                                                                                             | Biomarkers                                                               | Du            | 2015 | observ | diagnostic | 1  | 67   | cardiac surgery with CPB                                                                 | Other | 35   |
| High sensitive C-reactive protein and the risk of acute kidney injury among ST elevation myocardial infarction patients undergoing primary percutaneous intervention.                                        | Clinical and Experimental Nephrology                                     | Shacham       | 2015 | observ | diagnostic | 1  | 562  | ST elevation myocardial infarction (STEMI) undergoing percutaneous coronary intervention | AKIN  | 51   |
| Syndecan-1 in Acute Decompensated Heart Failure--Association With Renal Function and Mortality                                                                                                               | circulation journal official journal of the japanese Circulation Society | Neves         | 2015 | observ | diagnostic | 1  | 201  | acute decompensated heart failure                                                        | KDIGO | 62   |
| Pre-operative growth differentiation factor 15 as a novel biomarker of acute kidney injury after cardiac bypass surgery.                                                                                     | international journal of Cardiology                                      | Guenancia     | 2015 | observ | diagnostic | 1  | 134  | coronary artery bypass graft surgery                                                     | KDIGO | 42   |
| Greater increase in urinary hepcidin predicts protection from acute kidney injury after cardiopulmonary bypass.                                                                                              | Nephrology Dialyse transplantation                                       | Prowle        | 2012 | interv | diagnostic | 1  | 93   | cardiac surgery with CPB with at least one risk factor for AKI                           | RIFLE | 25   |
| Value of plasmatic membrane attack complex as a marker of severity in acute kidney injury.                                                                                                                   | BioMed research international                                            | Rodriguez     | 2014 | observ | diagnostic | 1  | 156  | sepsis, cisplatin, ischemie reperfusion, multifactoriel                                  | RIFLE | 81   |
| Serum uric acid level as a risk factor for acute kidney injury in hospitalized patients: a retrospective database analysis using the integrated medical information system at Kochi Medical School hospital. | Clinical and Experimental Nephrology                                     | Otomo         | 2016 | observ | diagnostic | 1  | #### | admission to the hospital                                                                | KDIGO | 7491 |
| The urinary levels of prostanoid metabolites predict acute kidney injury in heterogeneous adult Japanese ICU patients: a prospective observational study.                                                    | Clinical and Experimental Nephrology                                     | Ujike-Omori   | 2015 | observ | diagnostic | 1  | 93   | ICU patients                                                                             | AKIN  | 24   |

|                                                                                                                                                                          |                                                    |           |      |        |            |    |      |                                                                                                      |       |     |
|--------------------------------------------------------------------------------------------------------------------------------------------------------------------------|----------------------------------------------------|-----------|------|--------|------------|----|------|------------------------------------------------------------------------------------------------------|-------|-----|
| MicroRNA-21 and risk of severe acute kidney injury and poor outcomes after adult cardiac surgery.                                                                        | PLOS one                                           | Du        | 2013 | observ | diagnostic | 1  | 120  | cardiac surgery                                                                                      | AKIN  | 40  |
| Serum estradiol levels predict survival and acute kidney injury in patients with septic shock--a prospective study.                                                      | PLOS one                                           | Feng      | 2014 | observ | diagnostic | 1  | 107  | Pneumonia related septic shock                                                                       | RIFLE | 58  |
| B-type natriuretic peptide and risk of acute kidney injury in patients hospitalized with acute coronary syndromes*.                                                      | critical care medicine                             | Moltrasio | 2014 | observ | diagnostic | 1  | 639  | acute coronary syndromes patients undergoing emergency and urgent percutaneous coronary intervention | AKIN  | 85  |
| Monitoring of plasma creatinine and urinary γ-glutamyl transpeptidase improves detection of acute kidney injury by more than 20%.                                        | critical care medicine                             | Blasco    | 2011 | observ | diagnostic | 1  | 100  | ICU patients                                                                                         | Other | 36  |
| Early prediction of acute renal injury using urinary proteomics.                                                                                                         | American journal of Nephrology                     | Nguyen    | 2005 | observ | diagnostic | 1  | 60   | cardiac surgery with CPB                                                                             | Other | 15  |
| B-type natriuretic peptide and risk of contrast-induced acute kidney injury in acute ST-segment-elevation myocardial infarction: a substudy from the HORIZONS-AMI trial. | circulation cardiovascular interventions           | Jarai     | 2012 | interv | diagnostic | NR | 979  | ST elevation myocardial infarction (STEMI) undergoing percutaneous coronary intervention             | Other | 131 |
| Microalbuminuria in non-diabetic STEMI: an independent predictor for acute kidney injury.                                                                                | Scandinavian Cardiovascular Journal                | Lazzeri   | 2012 | observ | diagnostic | 1  | 526  | ST elevation myocardial infarction (STEMI) undergoing percutaneous coronary intervention             | Other | 59  |
| Preoperative serum brain natriuretic peptide and risk of acute kidney injury after cardiac surgery                                                                       | Circulation                                        | Pattel    | 2012 | observ | diagnostic | 6  | 1139 | cardiac surgery                                                                                      | AKIN  | 407 |
| Preoperative proteinuria predicts acute kidney injury in patients undergoing cardiac surgery.                                                                            | the Journal of Thoracic and Cardiovascular surgery | Coca      | 2012 | observ | diagnostic | 6  | 1159 | cardiac surgery                                                                                      | AKIN  | 409 |
| Markers of tubular and glomerular injury in predicting acute renal injury outcome in thermal burn patients: a prospective study.                                         | Renal Failure                                      | Sabry     | 2009 | observ | diagnostic | 1  | 40   | burn patients with >20%TBSA                                                                          | Other | 9   |



|                                                                                                                                                                                      |                                                        |           |      |        |            |     |      |                                                                                                                                                                                           |       |     |
|--------------------------------------------------------------------------------------------------------------------------------------------------------------------------------------|--------------------------------------------------------|-----------|------|--------|------------|-----|------|-------------------------------------------------------------------------------------------------------------------------------------------------------------------------------------------|-------|-----|
| C-reactive protein and the risk of contrast-induced acute kidney injury in patients undergoing percutaneous coronary intervention.                                                   | American journal of Nephrology                         | Gao       | 2011 | observ | diagnostic | 1   | 4522 | patients undergoing percutaneous coronary intervention (PCI) excluding acute myocardial infarction, cardiogenic shock, concomitant inflammatory conditions or undergoing CABG within 48 h | Other | 726 |
| Interleukin-8 and acute kidney injury following cardiopulmonary bypass: a prospective cohort study.                                                                                  | Nephron clinical Practice                              | Liangos   | 2009 | observ | diagnostic | 2   | 143  | cardiac surgery with CPB                                                                                                                                                                  | AKIN  | 41  |
| Evaluation of sE-Selectin and sICAM-1 as parameters for renal function.                                                                                                              | Renal Failure                                          | Dehne     | 2008 | observ | diagnostic | 1   | 33   | surgical ICU patients                                                                                                                                                                     | Other | 11  |
| Elevated plasma concentrations of IL-6 and elevated APACHE II score predict acute kidney injury in patients with severe sepsis.                                                      | Clinical Journal of the American Society of Nephrology | Chawla    | 2007 | interv | diagnostic | 164 | 547  | ICU patients with severe sepsis                                                                                                                                                           | Other | 127 |
| Neutrophil gelatinase-associated lipocalin as a diagnostic marker of acute kidney injury in pre-eclampsia.                                                                           | The journal of Obstetrics and Gynecology Research      | Moyake    | 2016 | observ | diagnostic | 1   | 187  | 109 women with the diagnostic of pre eclampsia and 78 controlled patients with normal pregnancy                                                                                           | KDIGO | 14  |
| Serum Neutrophil Gelatinase-Associated Lipocalin Levels In Early Detection Of Contrast-Induced Nephropathy.                                                                          | Clinical and investigative medicine                    | Muratoglu | 2016 | observ | diagnostic | 1   | 74   | Abdominal tomography with contrast                                                                                                                                                        | Other | 12  |
| Value of Serum Cystatin C Measurement in the Diagnosis of Sepsis-Induced Kidney Injury and Prediction of Renal Function Recovery.                                                    | Yonsei medical Journal                                 | Leem      | 2017 | observ | diagnostic | 1   | 162  | ICU patients with sepsis                                                                                                                                                                  | RIFLE | 113 |
| Procalcitonin and Interleukin-6 Levels: Are They Useful Biomarkers in Cardiac Surgery Patients?                                                                                      | Blood purification                                     | Clementi  | 2017 | observ | diagnostic | 1   | 122  | cardiac surgery                                                                                                                                                                           | AKIN  | 35  |
| Urinary interleukin-18 and urinary neutrophil gelatinase-associated lipocalin predict acute kidney injury following pulmonary valve replacement prior to serum creatinine.           | Congenital haert disease                               | Buelow    | 2012 | observ | diagnostic | 1   | 20   | cardiac surgery pulmonary valve replacement                                                                                                                                               | Other | 7   |
| Novel urinary biomarkers in detecting acute kidney injury, persistent renal impairment, and all-cause mortality following decongestive therapy in acute decompensated heart failure. | Journal of Cardiac failure                             | Verbrugge | 2013 | observ | diagnostic | 1   | 83   | acute decompensated heart failure                                                                                                                                                         | Other | 14  |
| Urinary actin, interleukin-6, and interleukin-8 may predict sustained ARF after ischemic injury in renal allografts.                                                                 | american Journal of kidney disease                     | Kwon      | 2003 | observ | diagnostic | 1   | 40   | renal transplant                                                                                                                                                                          | Other | 9   |
| Serum procalcitonin predicts development of acute kidney injury in patients with suspected infection.                                                                                | Clinical chemistry and laboratory medicine             | Nie       | 2013 | observ | diagnostic | 1   | 1361 | patients suspected of infection by 3                                                                                                                                                      | KDIGO | 199 |

|                                                                                                                                                                                                                                      |                                                    |                         |      |        |            |    |      |                                                                                          |       |     |
|--------------------------------------------------------------------------------------------------------------------------------------------------------------------------------------------------------------------------------------|----------------------------------------------------|-------------------------|------|--------|------------|----|------|------------------------------------------------------------------------------------------|-------|-----|
|                                                                                                                                                                                                                                      |                                                    |                         |      |        |            |    |      | approved internists                                                                      |       |     |
| Association of cardiac biomarkers with acute kidney injury after cardiac surgery: A multicenter cohort study.                                                                                                                        | the Journal of Thoracic and Cardiovascular surgery | Belley-Coté             | 2016 | observ | diagnostic | 6  | 960  | cardiac surgery                                                                          | Other | 37  |
| Evolution and predictive power of serum cystatin C in acute renal failure.                                                                                                                                                           | Clinical Nephrology                                | Ahlström                | 2004 | observ | diagnostic | 1  | 202  | ICU patients                                                                             | Other | 54  |
| The urine protein NGAL predicts renal replacement therapy, but not acute kidney injury or 90-day mortality in critically ill adult patients.                                                                                         | Anesthesia Analgesia                               | Nisula                  | 2014 | observ | diagnostic | 15 | 1042 | ICU patients                                                                             | KDIGO | 379 |
| Serum cystatin C in elderly cardiac surgery patients.                                                                                                                                                                                | The Annals of Thoracic Surgery                     | Ristikankare            | 2010 | observ | diagnostic | 1  | 110  | cardiac surgery with CPB                                                                 | RIFLE | 62  |
| Fluid balance and conventional and novel biomarkers of acute kidney injury in cardiovascular surgery.                                                                                                                                | The Annals of Thoracic Surgery                     | Kambhampati             | 2013 | observ | diagnostic | 1  | 100  | cardiac surgery                                                                          | AKIN  | 27  |
| Neutrophil gelatinase-associated lipocalin as early predictor of acute kidney injury after cardiac surgery in adults with chronic kidney failure.                                                                                    | The Annals of Thoracic Surgery                     | Perrotti                | 2014 | observ | diagnostic | 1  | 166  | cardiac surgery with CKD                                                                 | Other | 52  |
| Could neutrophil-gelatinase-associated lipocalin and cystatin C predict the development of contrast-induced nephropathy after percutaneous coronary interventions in patients with stable angina and normal serum creatinine values? | Kidney & Blood Pression Research                   | Bachorzewska-Gajewska H | 2007 | observ | diagnostic | 1  | 100  | patients undurgoing percutaneous coronary intervention (PCI)                             | Other | 11  |
| Urinary IL-18 and NGAL as early predictive biomarkers in contrast-induced nephropathy after coronary angiography.                                                                                                                    | Nephron clinical Practice                          | Ling                    | 2008 | observ | diagnostic | 1  | 40   | Patients undergoing coronary angiography                                                 | Other | 13  |
| Clinical usefulness of novel biomarkers for the detection of acute kidney injury following elective cardiac surgery.                                                                                                                 | Nephron clinical Practice                          | Che                     | 2010 | observ | diagnostic | 1  | 29   | cardiac surgery                                                                          | Other | 14  |
| Procalcitonin as an Early Predictor of Contrast-Induced Acute Kidney Injury in Patients With Acute Coronary Syndromes Who Underwent Percutaneous Coronary Intervention.                                                              | Angiology                                          | Kurtul                  | 2015 | observ | diagnostic | 1  | 814  | ST elevation myocardial infarction (STEMI) undergoing percutaneous coronary intervention | Other | 96  |
| Combination of two urinary biomarkers predicts acute kidney injury after adult cardiac surgery.                                                                                                                                      | The Annals of thoracic surgery                     | Katagiri                | 2012 | observ | diagnostic | 2  | 77   | cardiac surgery                                                                          | AKIN  | 28  |
| Urinary NGAL and KIM-1: biomarkers for assessment of acute ischemic kidney injury following nephron sparing surgery.                                                                                                                 | journal of Urology                                 | Abassi                  | 2013 | observ | diagnostic | 1  | 27   | Open nephron sparing surgery for solid renal tumor                                       | AKIN  | 10  |
| Urinary excretion of liver-type fatty acid-binding protein in contrast medium-induced nephropathy.                                                                                                                                   | american Journal of kidney disease                 | Nakamura                | 2006 | observ | diagnostic | 1  | 66   | patients undurgoing percutaneous coronary intervention (PCI)                             | Other | 13  |

|                                                                                                                                                                                             |                                                      |                 |      |        |            |    |     |                                                                     |       |    |
|---------------------------------------------------------------------------------------------------------------------------------------------------------------------------------------------|------------------------------------------------------|-----------------|------|--------|------------|----|-----|---------------------------------------------------------------------|-------|----|
| Urinary neutrophil gelatinase-associated lipocalin and acute kidney injury after cardiac surgery.                                                                                           | american Journal of kidney disease                   | Wagener         | 2008 | observ | diagnostic | 1  | 426 | cardiac surgery                                                     | AKIN  | 85 |
| Determination of urinary neutrophil gelatinase-associated lipocalin (NGAL) cut-off level for early detection of acute kidney injury in Thai adult patients undergoing open cardiac surgery. | journal of the medical association of Thailand       | Thanakitcharu P | 2014 | observ | diagnostic | 1  | 130 | cardiac surgery                                                     | AKIN  | 46 |
| Urinary Tissue Inhibitor of Metalloproteinase-2 and Insulin-Like Growth Factor-Binding Protein 7 for Risk Stratification of Acute Kidney Injury in Patients With Sepsis.                    | critical care medicine                               | Honore          | 2016 | observ | diagnostic | 39 | 232 | ICU patients with sepsis                                            | KDIGO | 40 |
| Simple blood and urinary parameters measured at ICU admission may sign for AKI development in the early postoperative period: a retrospective, exploratory study.                           | Renal Failure                                        | Maciel          | 2016 | observ | diagnostic | 1  | 112 | ICU patients en postop                                              | AKIN  | 28 |
| Clinical significance of NGAL and KIM-1 for acute kidney injury in patients with scrub typhus.                                                                                              | PLOS one                                             | Sun             | 2017 | observ | diagnostic | 1  | 138 | Typhus                                                              | RIFLE | 25 |
| Urinary cystatin C as an early biomarker of acute kidney injury after open and endovascular abdominal aortic aneurysm repair.                                                               | Annals of Vascular Surgery                           | Pirgakis        | 2014 | observ | diagnostic | 1  | 126 | abdominal aortic aneurysm                                           | AKIN  | 28 |
| Diagnostic and short-term prognostic utility of plasma pro-enkephalin (pro-ENK) for acute kidney injury in patients admitted with sepsis in the emergency department.                       | Journal of Nephrology                                | Marino          | 2015 | observ | diagnostic | 1  | 101 | sepsis                                                              | RIFLE | 49 |
| Importance of determination of urine neutrophile gelatinase associated lipocalin in early detection of acute kidney injury.                                                                 | collegium antropologicum                             | Omerika         | 2014 | observ | diagnostic | 1  | 150 | ICU patients after cardiac surgery                                  | RIFLE | 20 |
| Rapid detection of acute kidney injury by plasma and urinary neutrophil gelatinase-associated lipocalin after cardiopulmonary bypass.                                                       | J Cardiovasc Pharmacol                               | Tuladhar        | 2009 | observ | diagnostic | 1  | 50  | cardiac surgery with CPB                                            | Other | 9  |
| Rapid detection of acute kidney injury by urinary neutrophil gelatinase-associated lipocalin after cardiopulmonary bypass surgery.                                                          | J of the College of Physicians and surgeons Pakistan | Munir           | 2013 | observ | diagnostic | 1  | 88  | cardiac surgery with CPB                                            | AKIN  | 11 |
| Urinary neutrophil gelatinase-associated lipocalin for early detection of acute kidney injury in geriatric patients with urinary tract infection treated by colistin.                       | Clinical Nephrology                                  | Shavit          | 2013 | observ | diagnostic | 1  | 116 | geriatric patients with urinary tract infection treated by colistin | AKIN  | 52 |
| Plasma neutrophil gelatinase-associated lipocalin as early biomarker for acute kidney injury in burn patients.                                                                              | Journal of Burn Care & Research                      | Hong            | 2013 | observ | diagnostic | 1  | 45  | burn patients with >20%TBSA                                         | RIFLE | 11 |
| Implication of combined urinary biomarkers in early diagnosis of acute kidney injury following percutaneous coronary intervention.                                                          | Clinical Nephrology                                  | Luo             | 2013 | observ | diagnostic | 1  | 42  | percutaneous coronary intervention                                  | Other | 12 |
| Performance of urinary NGAL and L-FABP in predicting acute kidney injury and subsequent renal recovery: a cohort study based on major surgeries.                                            | Clinical chemistry and laboratory medicine           | Zeng            | 2014 | observ | diagnostic | 1  | 199 | major surgery                                                       | AKIN  | 37 |

|                                                                                                                                                                                                                            |                                                         |            |      |        |            |    |     |                                                             |       |    |
|----------------------------------------------------------------------------------------------------------------------------------------------------------------------------------------------------------------------------|---------------------------------------------------------|------------|------|--------|------------|----|-----|-------------------------------------------------------------|-------|----|
| Plasma neutrophil-gelatinase-associated lipocalin and cystatin C could early diagnose contrast-induced acute kidney injury in patients with renal insufficiency undergoing an elective percutaneous coronary intervention. | Chinese Medical Journal                                 | Liu        | 2012 | observ | diagnostic | 1  | 311 | percutaneous coronary intervention                          | Other | 39 |
| Neutrophil gelatinase-associated lipocalin as an early marker of acute kidney injury in patients with traumatic brain injury.                                                                                              | Journal of Nephrology                                   | Li         | 2013 | observ | diagnostic | 1  | 55  | traumatic brain injury                                      | AKIN  | 13 |
| Cystatin C as an early marker of acute kidney injury and predictor of mortality in the intensive care unit after acute myocardial infarction.                                                                              | arab journal of nephrology and transplantation          | Fouad      | 2013 | observ | diagnostic | 1  | 100 | ICU after acute myocardial infarction                       | Other | 35 |
| Post-operative serum uric acid and acute kidney injury.                                                                                                                                                                    | Journal of Nephrology                                   | Ejaz       | 2012 | observ | diagnostic | 1  | 100 | cardiac surgery                                             |       | NR |
| Assessment of NGAL as an early biomarker of acute kidney injury in adult cardiac surgery patients.                                                                                                                         | journal of biological regulators and homeostatic agents | Sargentini | 2012 | observ | diagnostic | 1  | NR  | cardiac surgery with CPB                                    |       | NR |
| urine biomarkers give early prediction of acute kidney injury and outcome after out of hospital cardiac arrest                                                                                                             | Critical care                                           | Beitland   | 2016 | observ | diagnostic | 1  | 195 | out of hospital cardiac arrest                              | KDIGO | 88 |
| Early prediction of acute kidney injury biomarkers after endovascular stent graft repair of aortic anevrysm : A prospective observational study                                                                            | Journal of intensive Care                               | Ueta       | 2014 | observ | diagnostic | 1  | 42  | endovascular stent graft repair of aortic anevrysm          | AKIN  | 6  |
| Comparative analysis of diagnostic and predictive performance of novel renal biomarkers in plasma and urine of acute kidney injury patients                                                                                | Intensive care Medicine Experimental                    | Schley     | 2015 | observ | diagnostic | 1  | 110 | cardiac surgery                                             | AKIN  |    |
| urinary TIMP-2 and IGFBP7 for the prediction of acute kidney injury following cardiac surgery                                                                                                                              | BMC nephrology                                          | Wang       | 2017 | observ | diagnostic | 1  | 57  | cardiac surgery                                             | KDIGO | 20 |
| urinary [TIMP-2]*[IGFBP7] for early prediction of acute kidney injury after coronary artery bypass surgery                                                                                                                 | Annals of Intensive Care                                | Pilarczyk  | 2015 | observ | diagnostic | 1  | 60  | elective on pump CABG due to severe coronary artery disease | KDIGO | 19 |
| C-terminal fragment of agrin (CAF) levels predict acute kidney injury after acute myocardial infarction                                                                                                                    | BMC nephrology                                          | Arampatzis | 2017 | observ | diagnostic | 3  | 403 | acute myocardial infarction                                 | KDIGO | 59 |
| Association of Renal Stress/damage and filtration Biomarkers with subsequent AKI during hospitalization among patients presenting to the emergency department                                                              | Clinical Journal of the American Society of Nephrology  | Kimmel     | 2016 | observ | diagnostic | 1  | 298 | emergency patients                                          | KDIGO | 46 |
| Efficacy of urinary midkine as a biomarker in patients with acute kidney injury                                                                                                                                            | Clinical and Experimental Nephrology                    | Hayashi    | 2017 | observ | diagnostic | NR | 582 | 33 controles et 549 patients with various renal diseases    | KDIGO | 67 |
| early prediction of acute kidney injury after transapical and transaortic aortic valve implantation with urinary G1 cell cycle arrest biomarkers                                                                           | BMC anesthesiology                                      | Dusse      | 2016 | observ | diagnostic | 1  | 40  | TAVI                                                        | KDIGO | 8  |

|                                                                                                                                                                        |                                                               |                 |      |        |            |   |     |                                                       |       |    |
|------------------------------------------------------------------------------------------------------------------------------------------------------------------------|---------------------------------------------------------------|-----------------|------|--------|------------|---|-----|-------------------------------------------------------|-------|----|
| urinary TIMP2 IGFBP7 for the prediction of platinum-induced acute renal injury                                                                                         | international journal of nephrology and renovascular diseases | schanz          | 2017 | observ | diagnostic | 1 | 32  | malignant disease, therapy with cysplatin             | KDIGO | 4  |
| post cardiac surgery acute kidney injury : a woebegone status rejuvenated by the novel biomarkers                                                                      | iranian red crescent medical journal                          | Jayaraman       | 2014 | observ | diagnostic | 1 | 100 | cardiac surgery                                       |       | 31 |
| Early prediction of acute kidney injury in patients with acute myocardial injury                                                                                       | journal of critical care                                      | Hsiao           | 2012 | observ | diagnostic | 1 | 86  | SCA                                                   | AKIN  | 17 |
| Serum Neutrophil Gelatinase-associated Lipocalin versus serum creatinine for the prediction of acute kidney injury after liver transplantation                         | international journal of organ traansplantation               | Khosravi        | 2013 | observ | diagnostic | 1 | 90  | liver transplantation                                 | RIFLE | 31 |
| Neutrophil gelatinase-associated lipocalin as a biomarker for pedicting acute kidney injury during off-pump coronary artery bypass grafting                            | Annals of Cardiac Anaesthesia                                 | Kanchi          | 2017 | interv | diagnostic | 1 | 90  | stable CKD not on dialysis scheduled for on pump-CABG | KDIGO | 28 |
| Neutrophil gelatinasee-associated lipocalin (NGAL) predicts the occurrence of malaria-induced acute kidney injury                                                      | Malaria journal                                               | Van Wolfswinkel | 2016 | observ | diagnostic | 1 | 39  | imported falciparum malaria                           | KDIGO | 6  |
| Plasma endostatin may improve acute kidney injury risk prediction in critically ill patients                                                                           | Annals of intensive care                                      | Martensson      | 2016 | observ | diagnostic | 1 | 93  | ICU                                                   | KDIGO | 21 |
| creatinine, Neutrophil gelatinase-associated lipocalin and cystatin C in determining acute kidney injury after heart operations using cardiopulmonary bypass           | Artificial organs                                             | Kalisnik        | 2017 | observ | diagnostic | 1 | 41  | cardiac surgery                                       | AKIN  | 18 |
| plasma neutrophil gelatinase-associated lipocalin diagnosed acute kidney injury in patients with systemic inflammatory disease and sepsis                              | Nephrology                                                    | Ralib           | 2017 | observ | diagnostic | 1 | 225 | ICU patients with sepsis                              | KDIGO | 87 |
| Kidney damage biomarkers detect acute kidney injury but only functional markers predict mortality after paraquat ingestion                                             | Toxicology letters                                            | Mohamed         | 2015 | observ | diagnostic | 1 | 50  | paraquat poisoning                                    | AKIN  | 26 |
| Acute kidney injury prediction in cardiac surgery patients by a urinary peptide pattern: a case-control validation study                                               | Critical care                                                 | Metzger         | 2016 | observ | diagnostic | 1 | 120 | cardiac surgery                                       | AKIN  | 60 |
| Novel urinary biomarkers and the early detection of acute kidney injury after open cardiac surgeries                                                                   | journal of critical care                                      | Elmedany        | 2017 | observ | diagnostic | 1 | 45  | cardiac surgery                                       | AKIN  | 11 |
| Urine catalytic iron and Neutrophil gelatinase-associated lipocalin as companion early markers of acute kidney injury after cardiac surgery :a prospective pilot study | american Journal of kidney disease                            | Akrawinthawong  | 2013 | observ | diagnostic | 1 | 14  | Cardiac surgery                                       | AKIN  | 8  |
| Early prediction of cisplatin nephrotoxicity in head and neck cancer patients an evaluation with urinary biomarkers                                                    | International journal of pharmaceutical sciences and research | Saleena         | 2015 | observ | diagnostic | 1 | NR  | cisplatin for head and neck cancer                    |       | NR |
| Urinary neutrophil gelatinase associated lipocalin ( NGAL) for early diagnosis of acute kidney injury in renal transplant recipients                                   | Nephro-Urology Monthly                                        | Rostami         | 2013 | observ | diagnostic | 1 | 64  | kidney transplantation recipients                     | Other | 31 |

|                                                                                                                                                                                                                                |                                               |                        |      |        |            |    |      |                          |       |     |
|--------------------------------------------------------------------------------------------------------------------------------------------------------------------------------------------------------------------------------|-----------------------------------------------|------------------------|------|--------|------------|----|------|--------------------------|-------|-----|
| neutrophil gelatinase associated lipocalin as a biomarker for acute kidney injury in patients undergoing coronary artery bypass grafting with cardiopulmonary bypass                                                           | Annals of Vascular Surgery                    | Prabhu                 | 2010 | observ | diagnostic | 1  | 30   | CABG                     | RIFLE | 8   |
| NGAL expression during cardiopulmonary bypass does not predict severity of postoperative acute kidney injury                                                                                                                   | BMC nephrology                                | Friedrich              | 2017 | observ | diagnostic | 1  | 81   | cardiac surgery with CPB | AKIN  | 31  |
| Neutrophil gelatinase-associated lipocalin for acute kidney injury during acute heart failure hospitalizations : the AKINESIS study                                                                                            | Journal of the american College of Cardiology | Maisel                 | 2016 | observ | diagnostic | 16 | 927  | acute heart failure      | RIFLE | 72  |
| diagnostic value of matrix metalloproteinase-9 and tissue inhibitor of matrix metalloproteinase-1 in sepsis associated acute kidney injury                                                                                     | Tohoku journal of experimental medicine       | Bojic                  | 2015 | observ | diagnostic | 1  | 53   | sepsis                   | KDIGO | 37  |
| Urine Ratio of neutrophil gelatinase-associated lipocalin to creatinine as a marker for early detection of cisplatin-associated nephrotoxicity                                                                                 | Iranian journal of kidney diseases            | Shahbani               | 2015 | observ | diagnostic | 1  | 24   | cisplatin chemotherapy   | AKIN  | 2   |
| diagnosis of cardiac surgery-associated acute kidney injury: differential roles of creatinine, chitinase 3-like protein 1 and neutrophil gelatinase-associated lipocalin : a prospective cohort study                          | Annals of Intensive Care                      | De Loor                | 2017 | observ | diagnostic | 1  | 203  | cardiac surgery          | KDIGO | 103 |
| Neutrophil gelatinase-associated lipocalin levels during the first 48 hours of intensive care may indicate upcoming acute kidney injury                                                                                        | Journal of critical care                      | Kamis                  | 2016 | observ | diagnostic | 1  | 107  | ICU                      | RIFLE | 38  |
| AKI predictor, an online prognostic calculator for acute kidney injury in adult critically ill patients: development, validation and comparison to serum neutrophil gelatinase-associated lipocalin                            | Intensive care medicine                       | Flechet                | 2017 | observ | diagnostic | 7  | 2367 | ICU                      | KDIGO |     |
| Urinary neutrophil gelatinase associated lipocalin as an early marker of acute kidney injury in the recipient after liver transplantation                                                                                      | Egyptian journal of critical care medicine    | El-Akabawy             | 2017 | observ | diagnostic | 1  | 30   | liver transplantation    | RIFLE |     |
| diagnostic and prognostic value of neutrophil gelatinase associated lipocalin, matrix metalloproteinase-9, and tissue inhibitor of matrix metalloproteinases-1 for sepsis in the emergency department : an observational study | critical care                                 | Wang                   | 2014 | observ | diagnostic | 1  | 480  | SIRS                     | AKIN  | NR  |
| Assessment of plasma neutrophil gelatinase-associated lipocalin (NGAL) in patients after cardiac surgery                                                                                                                       | Anaesthesiology and intensive care            | Dimitrova-Karamphilova | 2013 | observ | diagnostic | 1  | 70   | cardiac surgery          | RIFLE | 15  |
| Evaluation of serum neutrophil gelatinase-associated lipocalin in predicting acute kidney injury in critically ill patients                                                                                                    | Journal of international medical Research     | Hang                   | 2017 | observ | diagnostic | 1  | 249  | emergency patients       | KDIGO | 101 |
| Assessment of fractional excretion of urea for early diagnosis of cardiac surgery associated acute kidney injury                                                                                                               | Renal Failure                                 | Varela                 | 2015 | observ | diagnostic | 1  | 66   | cardiac surgery          | AKIN  | 16  |

|                                                                                                                                                                                     |                                                   |                 |      |        |            |   |      |                                                    |       |     |
|-------------------------------------------------------------------------------------------------------------------------------------------------------------------------------------|---------------------------------------------------|-----------------|------|--------|------------|---|------|----------------------------------------------------|-------|-----|
| Plasma neutrophil gelatinase-associated lipocalin (NGAL) as an early predictive marker of contrast-induced nephropathy in hospitalized patients undergoing computed tomography      | Clinical kidney journal                           | Filiopoulos     | 2013 | observ | diagnostic | 1 | 47   | elective contrast tomography                       | Other | 4   |
| the role of neutrophil gelatinase-associated lipocalin in early diagnosis of contrast nephropathy                                                                                   | Indian journal of nephrology                      | Khatami         | 2015 | observ | diagnostic | 1 | 121  | coronary angiography                               | Other | 7   |
| Urinary neutrophil gelatinase-associated lipocalin as a biomarker of kidney injury in hematologic-oncologic patients receiving amphotericin B                                       | Iranian journal ok kidney diseases                | Karimzadeh      | 2017 | observ | diagnostic | 3 | 40   | amphotericin B                                     | KDIGO |     |
| Acute kidney injury during liver transplantation as determined by neutrophil gelatinase-associated lipocalin                                                                        | Liver transplantation                             | Niemann         | 2009 | observ | diagnostic | 1 | 59   | liver transplantation                              | RIFLE | 27  |
| plasma neutrophil gelatinase associated lipocalin in the early detection of acute kidney injury in patients undergoing cardiac surgery                                              | International Journal of Pharma and bio sciences  | Anusha          | 2015 | observ | diagnostic | 1 | 103  | cardiac surgery versus healthy individuals         | AKIN  | 13  |
| early predictors of acute kidney injury in patients with cirrhosis and bacterial infection: urinary neutrophil gelatinase-associated lipocalin and cardiac output as reliable tools | Kidney research and clinical practice             | Ximenes         | 2015 | observ | diagnostic | 1 | 18   | cirrhosis and bacteial infection                   | Other |     |
| Urine Neutrophil gelatinase-associated lipocalin: a doagnostic and prognostic marker for acute kidney injury (AKI) in hospitalized cirrhotic patients with AKI-prone conditions     | BMC gastroenterology                              | Treeprasertsuk  | 2015 | observ | diagnostic | 1 | 121  | hospitalized cirrhosis                             | AKIN  | 35  |
| Urinary neutrophil gelatinase-associated lipocalin in critically ill surgical cancer patients                                                                                       | Indian journal of critical care medicine          | Delifino duarte | 2015 | observ | diagnostic | 1 | 22   | major oncological surgeries                        | AKIN  | 3   |
| Urinary KIM-1, IL-18 and Cys-c as early predictive biomarkers in gadolinium-based contrast-induced nephropathy in elderly patients                                                  | Clinical Nephrology                               | Duan            | 2013 | observ | diagnostic | 1 | 60   | elderly patients scheduled for MRI with gadolinium | Other | 8   |
| Evaluation of clinically available renal biomarkers in critically ill adults: a prospective multicenter observational study                                                         | Critical care                                     | Deng            | 2017 | observ | diagnostic | 1 | 1084 | ICU                                                | KDIGO | 326 |
| Cystatin C is a moderate predictor of acute kidney injury in the early stage of traumatic hemorrhagic shock                                                                         | Experimental and therapeutic medicine             | Chen            | 2015 | observ | diagnostic | 1 | 57   | traumatic hemorrhage versus control                | Other | 18  |
| A preoperative multimarker approach to evaluate acute kidney injury after cardiac surgery                                                                                           | Journal of cardiothoracic and vascular anesthesia | Enger           | 2017 | observ | diagnostic | 1 | 1015 | cardiac surgery with CPB                           | KDIGO | 100 |
| Diagnostic value of N-Acetyl-β-D-glucosaminidase for the early prediction of acute kidney injury after percutaneous nephrolithotripsy                                               | Experimental and therapeutic medicine             | Jiang           | 2013 | observ | diagnostic | 1 | 90   | percutaneous nephrolithotripsy                     | AKIN  | 11  |
| serum Cystatin C as a predictor of cardiac surgery associated-acute kidney injury in patients with normal preoperative renal function. A prospective cohort study                   | Egyptian journal of critical care medicine        | Samy            | 2017 | observ | diagnostic | 1 | 40   | cardiac surgery with CPB                           | AKIN  | 20  |

|                                                                                                                                                                                                    |                                                             |            |      |        |            |   |      |                                   |       |     |
|----------------------------------------------------------------------------------------------------------------------------------------------------------------------------------------------------|-------------------------------------------------------------|------------|------|--------|------------|---|------|-----------------------------------|-------|-----|
| Plasma microRNA-21 for the early prediction of acute kidney injury in patients undergoing major cardiac surgery                                                                                    | Nephrology dialysis Transplantation                         | Gaede      | 2016 | observ | diagnostic | 1 | 115  | cardiac surgery                   | KDIGO | 42  |
| Serum Cystatin C as a marker of renal function in critically ill patients with normal serum creatinine                                                                                             | Nephro-Urology Monthly                                      | Sagheb     | 2014 | observ | diagnostic | 1 | 80   | ICU                               | Other | 59  |
| Evaluation of serum Cysteine-rich protein 61 and cystatin C levels for assessment of acute kidney injury after cardiac surgery                                                                     | Renal Failure                                               | Mosa       | 2016 | observ | diagnostic | 1 | 50   | cardiac surgery with CPB          | KDIGO | 26  |
| Klotho: a novel ans early biomarker of acute kidney injury after cardiac valve replacement surgery in adults                                                                                       | International Journal of Clinical and Experimental medicine | Liu        | 2015 | observ | diagnostic | 1 | 35   | cardiac valve replacement surgery | AKIN  | 19  |
| Significance of cystatin C for early diagnosis of contrast-induced nephropathy in patients undergoing coronary angiography                                                                         | Medical science monitor                                     | Wang       | 2016 | observ | diagnostic | 1 | 300  | coronary angiography              | Other | 29  |
| cystatin C for early detection of acute kidney injury after laparoscopic partial nephrectomy                                                                                                       | Urology Annals                                              | Alesawi    | 2014 | observ | diagnostic | 1 | 25   | partial nephrectomy               | AKIN  | 4   |
| Preoperative plasma growth-differentiation factor-15 for prediction of acute kidney injury in patients undergoing cardiac surgery                                                                  | Critical care                                               | Heringlake | 2016 | observ | diagnostic | 1 | 1176 | cardiac surgery                   | KDIGO | 258 |
| Heparin-binding protein as a biomarker of acute kidney injury in critical illness                                                                                                                  | ACTA anaesthesiologica Scandinavica                         | Tyden      | 2017 | observ | diagnostic | 1 | 245  | ICU                               | KDIGO | 80  |
| The serum heart-type fatty acid-binding protein(HFABP) levels ccan be used to detect the presence of acute kidney injury on admission in patients admitted to the non-surgical intensive care unit | BMC cardiovascular disorders                                | Shirakabe  | 2016 | observ | diagnostic | 1 | 494  | ICU                               | RIFLE | 145 |
