# Supplementary material
Source: publisher figshare collection journal article supplement (https://tandf.figshare.com/articles/dataset/_/7001348)
Supplement: Supplementary file 3 [file 1]

# **Methods used to assess the performance of biomarkers for the diagnosis of Acute Kidney Injury: a systematic review and meta-analysis:**

Anaïs Codorniu<sup>1,2</sup> ,MD, Léa Lemasle<sup>1,2</sup> ,MD, Matthieu Legrand<sup>1,2</sup> ,MD,PhD, Alice Blet<sup>1,2</sup>,MD,PhD, Alexandre Mebazaa<sup>1,2</sup>,MD, PhD, Etienne Gayat<sup>1,2</sup> MD, PhD

1 Department of Anesthesiology, Intensive Care and Burn Unit, University Hospital Saint Louis – Lariboisière, Assistance Publique – Hôpitaux de Paris, Paris, France

2 Biomarkers in CArdio-Neuro-VAScular diseases (BioCANVAS), UMR-S 942, Inserm, Paris, France

---

## **Supplementary Material**

---

**Supplementary Table 1.** List of the 112 Biomarkers studied in the articles included in the systematic review.

| Biomarker                | Number of studies | number of patients analyzed | Number of patients with AKI | Biomarker                | Number of studies | number of patients analyzed | Number of patients with AKI |
|--------------------------|-------------------|-----------------------------|-----------------------------|--------------------------|-------------------|-----------------------------|-----------------------------|
| Albumine                 | 1                 | 339                         | 131                         | s ST2                    | 1                 | 189                         | 37                          |
| alpha GST                | 2                 | 374                         | 118                         | s Syndecan 1             | 1                 | 201                         | 62                          |
| alpha GST + pi GST       | 2                 | 345                         | 97                          | s TNFalpha               | 2                 | 200                         | 27                          |
| alpha1 acid glycoprotein | 1                 | 635                         | 30                          | s TNFR-I                 | 1                 | 876                         | 209                         |
| alpha1 Microglobulin     | 2                 | 738                         | 43                          | s uric acid              | 3                 | 59379                       | 7531                        |
| AP/uCr                   | 1                 | 528                         | 147                         | testosterone             | 1                 | 107                         | 58                          |
| BUN                      | 3                 | 534                         | 170                         | Thrombomodulin           | 1                 | 80                          | 56                          |
| Cathepsin L              | 1                 | 100                         | 23                          | TIMP2 x<br>IGFBP7        | 9                 | 2189                        | 380                         |
| estradiol                | 1                 | 107                         | 58                          | u 11-dehydro-TXB2/Cr     | 1                 | 93                          | 24                          |
| FGF-23                   | 1                 | 3241                        | 119                         | u 2,3-dinor-6-OXO-PGF1a/ | 1                 | 93                          | 24                          |
| GGT/uCr                  | 1                 | 528                         | 147                         | u 20 markers pattern     | 2                 | 58                          | 25                          |
| LG3                      | 1                 | 100                         | 23                          | u 6-keto-PGF1alpha       | 1                 | 28                          | 16                          |
| LTBP2                    | 1                 | 100                         | 23                          | u 8 iso-PGF2alpha        | 1                 | 28                          | 16                          |
| microalbuminurie         | 2                 | 566                         | 68                          | u Actin                  | 1                 | 40                          | 9                           |
| Midkine                  | 1                 | 89                          | 9                           | u AGT                    | 1                 | 317                         | 104                         |
| NT proBNP                | 1                 | 134                         | 42                          | u Albumine               | 1                 | 85                          | 48                          |
| p sTREM-1                | 1                 | 112                         | 55                          | u Albumine/creatinine    | 6                 | 2520                        | 698                         |
| pi GST                   | 3                 | 467                         | 143                         | u alpha1 microglobulin   | 3                 | 169                         | 75                          |
| proANP(1?98)             | 1                 | 29                          | 10                          | u alpha-GST              | 2                 | 519                         | 68                          |
| progesterone             | 1                 | 107                         | 58                          | u beta2microglobulin     | 1                 | 89                          | 28                          |
| protein C                | 1                 | 80                          | 56                          | u calprotectin           | 1                 | 147                         | 43                          |
| proteinurie              | 1                 | 616                         | 179                         | u CHI3L1                 | 1                 | 181                         | 6                           |
| s Albumine               | 1                 | 112                         | 28                          | u creatinine             | 1                 | 187                         | 14                          |
| S Amyloid A              | 1                 | 1361                        | 199                         | u Cystatin C             | 23                | 7645                        | 1949                        |
| s AOPP (Advanced         | 1                 | 67                          | 35                          | u FE potassium           | 1                 | 112                         | 28                          |

|                              |    |       |      |                            |     |       |      |
|------------------------------|----|-------|------|----------------------------|-----|-------|------|
| Oxydation protein products)  |    |       |      |                            |     |       |      |
| s beta2microglobulin         | 1  | 89    | 28   | u GGT                      | 5   | 767   | 294  |
| s BNP                        | 5  | 3149  | 738  | u Hepcidin                 | 6   | 817   | 121  |
| s cardiac troponin 1         | 1  | 960   | 37   | u Hsp72                    | 1   | 37    | 17   |
| s CK-MB                      | 1  | 960   | 37   | u IGFBP-7                  | 1   | 728   | 101  |
| s Creatinine                 | 27 | 3864  | 769  | u IL-10                    | 2   | 232   | 118  |
| s CRP                        | 3  | 5995  | 953  | u IL-18                    | 28  | 10632 | 1971 |
| s Cystatin C                 | 54 | 10504 | 3061 | u IL-1beta                 | 1   | 39    | 13   |
| s Cystatin C /sCr ratio      | 1  | 373   | 79   | u IL-6                     | 2   | 80    | 16   |
| s Cystatin C + KIM-1         | 1  | 103   | 49   | u IL-8                     | 3   | 108   | 32   |
| s cystatin C + uNGAL         | 1  | 103   | 49   | u KIM1                     | 25  | 5796  | 1092 |
| s EPO                        | 1  | 98    | 42   | u KIM-1/ucreat             | 1   | 528   | 147  |
| s GDF-15                     | 1  | 134   | 42   | u L-FABP                   | 24  | 5715  | 1019 |
| s hepcidin                   | 2  | 193   | 34   | u MALB                     | 1   | 89    | 28   |
| s H-FABP                     | 2  | 1241  | 399  | u MCP-1                    | 2   | 73    | 50   |
| s high sensitive troponine T | 1  | 960   | 37   | U MDA (Malondialdehyde)    | 1   | 40    | 9    |
| s hs-CRP                     | 1  | 562   | 51   | u MIF                      | 1   | 39    | 13   |
| s IL-10                      | 2  | 1836  | 539  | u miRNA-21                 | 1   | 120   | 40   |
| s IL-18                      | 1  | 150   | 43   | u NAG                      | 12  | 2135  | 616  |
| s IL-6                       | 7  | 4004  | 949  | u Netrin 1                 | 1   | 150   | 49   |
| s IL-8                       | 3  | 1059  | 257  | u NGAL                     | 107 | 21471 | 4992 |
| s KIM1                       | 4  | 211   | 52   | u NGAL/hepcidin            | 1   | 102   | 54   |
| s L-FABP                     | 2  | 180   | 82   | u Osteopontin              | 1   | 31    | 20   |
| s MCP-1                      | 1  | 100   | 27   | u PGE2/Cr                  | 1   | 93    | 24   |
| s Membran Attack Complex     | 1  | 156   | 81   | u pi-GST                   | 3   | 596   | 94   |
| s mi-RNA                     | 2  | 86    | 52   | u proteomics               | 1   | 60    | 15   |
| s miRNA-21                   | 1  | 120   | 40   | u retinol binding proteine | 1   | 29    | 14   |
| s NGAL                       | 70 | 12883 | 2938 | u sE selectin              | 1   | 33    | 11   |
| s NT-proBNP                  | 1  | 960   | 37   | u sICAM-1                  | 1   | 33    | 11   |
| s PAI-1                      | 1  | 876   | 209  | u sTREM-1                  | 1   | 112   | 55   |
| s PCT                        | 3  | 2297  | 330  | u TIMP2                    | 2   | 826   | 143  |
| s pro-ENK                    | 1  | 101   | 49   | u TNF-alpha                | 1   | 28    | 16   |
